# Supplementary material for: Impact of alkaline-earth doping on electronic properties of the photovoltaic perovskite CsSnI3: insights from a DFT perspective
Source: Royal Society of Chemistry journal article supplement (doi:10.1039/d1dt04041c), 2022-01-01
Supplement: d1dt04041c2.pdf [file d1dt04041c2.pdf]

# Supplementary Information 2 for

Impact of alkaline-earth doping on electronic properties of the photovoltaic perovskite CsSnI<sub>3</sub>: Insights from a DFT perspective

I. Ornelas-Cruz<sup>a</sup>, I. González<sup>a</sup>, J. Pilo<sup>a</sup>, A. Tejedor<sup>a</sup>, R. Oviedo-Roa<sup>b,\*</sup>, M. Cruz-Orison<sup>a</sup>

<sup>a</sup> Instituto Politécnico Nacional, ESIME-Culhuacán, Av. Santa Ana 1000, 04440 Ciudad de México, México.

<sup>b</sup> Instituto Mexicano del Petróleo, Eje Central Lázaro Cárdenas Norte 152, 07730 Ciudad de México, México.

\*Corresponding authors: iornelas.ipn@gmail.com, oviedor@imp.mx

| CsSnI <sub>3</sub> - Orthorhombic |     |              |             | 6X4X6; 0.02 eV |         |                         |
|-----------------------------------|-----|--------------|-------------|----------------|---------|-------------------------|
|                                   | Ry  | Energy total | Free energy | % ET           | % FE    | ΔE <sub>c</sub> {Total} |
| 1                                 | 40  | -14912.3005  | -14912.3013 |                |         |                         |
| 2                                 | 80  | -14895.8328  | -14895.8336 | -0.1104        | -0.1104 | -16.4677                |
| 3                                 | 120 | -14894.0615  | -14894.0623 | -0.0119        | -0.0119 | -1.7713                 |
| 4                                 | 160 | -14893.7075  | -14893.7083 | -0.0024        | -0.0024 | -0.3540                 |
| 5                                 | 200 | -14893.5787  | -14893.5795 | -0.0009        | -0.0009 | -0.1288                 |
| 6                                 | 240 | -14893.5116  | -14893.5124 | -0.0005        | -0.0005 | -0.0671                 |
| 7                                 | 280 | -14893.5024  | -14893.5032 | -0.0001        | -0.0001 | -0.0092                 |
| 8                                 | 320 | -14893.4788  | -14893.4796 | -0.0002        | -0.0002 | -0.0236                 |
| 9                                 | 360 | -14893.4740  | -14893.4749 | 0.0000         | 0.0000  | -0.0048                 |
| 10                                | 400 | -14893.4637  | -14893.4645 | -0.0001        | -0.0001 | -0.0104                 |
| 11                                | 440 | -14893.4547  | -14893.4555 | -0.0001        | -0.0001 | -0.0090                 |
| 12                                | 480 | -14893.4538  | -14893.4546 | 0.0000         | 0.0000  | -0.0009                 |
| 13                                | 520 | -14893.4519  | -14893.4528 | 0.0000         | 0.0000  | -0.0018                 |
| 14                                | 560 | -14893.4495  | -14893.4503 | 0.0000         | 0.0000  | -0.0024                 |
| 15                                | 600 | -14893.4475  | -14893.4484 | 0.0000         | 0.0000  | -0.0020                 |
| 16                                | 640 | -14893.4463  | -14893.4471 | 0.0000         | 0.0000  | -0.0013                 |
| 17                                | 680 | -14893.4459  | -14893.4468 | 0.0000         | 0.0000  | -0.0003                 |

| MgI <sub>2</sub> |     |              |             | 6X6X4; 0.02 eV |         |                         |
|------------------|-----|--------------|-------------|----------------|---------|-------------------------|
|                  | Ry  | Energy total | Free energy | % ET           | % FE    | ΔE <sub>c</sub> {Total} |
| 1                | 40  | -2444.5588   | -2444.5588  |                |         |                         |
| 2                | 80  | -2441.8979   | -2441.8979  | -0.1089        | -0.1089 | -2.6609                 |
| 3                | 120 | -2441.3140   | -2441.3140  | -0.0239        | -0.0239 | -0.5839                 |
| 4                | 160 | -2441.1136   | -2441.1136  | -0.0082        | -0.0082 | -0.2004                 |
| 5                | 200 | -2441.0857   | -2441.0857  | -0.0011        | -0.0011 | -0.0279                 |
| 6                | 240 | -2441.0612   | -2441.0612  | -0.0010        | -0.0010 | -0.0245                 |
| 7                | 280 | -2441.0481   | -2441.0481  | -0.0005        | -0.0005 | -0.0130                 |
| 8                | 320 | -2441.0465   | -2441.0465  | -0.0001        | -0.0001 | -0.0016                 |
| 9                | 360 | -2441.0392   | -2441.0392  | -0.0003        | -0.0003 | -0.0073                 |
| 10               | 400 | -2441.0383   | -2441.0383  | 0.0000         | 0.0000  | -0.0009                 |
| 11               | 440 | -2441.0383   | -2441.0383  | 0.0000         | 0.0000  | 0.0000                  |
| 12               | 480 | -2441.0383   | -2441.0383  | 0.0000         | 0.0000  | 0.0000                  |
| 13               | 520 |              |             |                |         |                         |
| 14               | 560 |              |             |                |         |                         |
| 15               | 600 |              |             |                |         |                         |
| 16               | 640 |              |             |                |         |                         |
| 17               | 680 |              |             |                |         |                         |

| CaI <sub>2</sub> |     |              |             | 6X6X3; 0.02 eV |         |                         |
|------------------|-----|--------------|-------------|----------------|---------|-------------------------|
|                  | Ry  | Energy total | Free energy | % ET           | % FE    | ΔE <sub>c</sub> {Total} |
| 1                | 40  | -2481.0065   | -2481.0065  |                |         |                         |
| 2                | 80  | -2476.5986   | -2476.5986  | -0.1777        | -0.1777 | -4.4080                 |
| 3                | 120 | -2476.2352   | -2476.2352  | -0.0147        | -0.0147 | -0.3633                 |
| 4                | 160 | -2476.2153   | -2476.2153  | -0.0008        | -0.0008 | -0.0200                 |
| 5                | 200 | -2476.1417   | -2476.1417  | -0.0030        | -0.0030 | -0.0736                 |
| 6                | 240 | -2476.1200   | -2476.1200  | -0.0009        | -0.0009 | -0.0217                 |
| 7                | 280 | -2476.1200   | -2476.1200  | 0.0000         | 0.0000  | 0.0000                  |
| 8                | 320 | -2476.1072   | -2476.1072  | -0.0005        | -0.0005 | -0.0128                 |
| 9                | 360 | -2476.1072   | -2476.1072  | 0.0000         | 0.0000  | 0.0000                  |
| 10               | 400 | -2476.1062   | -2476.1062  | 0.0000         | 0.0000  | -0.0010                 |
| 11               | 440 | -2476.1050   | -2476.1050  | 0.0000         | 0.0000  | -0.0012                 |
| 12               | 480 | -2476.1030   | -2476.1030  | -0.0001        | -0.0001 | -0.0020                 |
| 13               | 520 | -2476.1030   | -2476.1030  | 0.0000         | 0.0000  | 0.0000                  |
| 14               | 560 | -2476.1016   | -2476.1016  | -0.0001        | -0.0001 | -0.0014                 |
| 15               | 600 | -2476.1014   | -2476.1014  | 0.0000         | 0.0000  | -0.0002                 |
| 16               | 640 | -2476.1014   | -2476.1014  | 0.0000         | 0.0000  | 0.0000                  |

| CsSnI3 - Orthorhombic |       |              | 480 Ry; 0.02 eV |        |        |                             |
|-----------------------|-------|--------------|-----------------|--------|--------|-----------------------------|
|                       |       | Energy total | Free energy     | % ET   | % FE   | $\Delta E_{\text{(Total)}}$ |
| 1                     | 1X1X1 | -14888.0832  | -14888.1851     |        |        |                             |
| 2                     | 2X2X2 | -14893.0954  | -14893.1057     | 0.0337 | 0.0331 | 5.0122                      |
| 3                     | 3X2X3 | -14893.2993  | -14893.3038     | 0.0014 | 0.0013 | 0.2039                      |
| 4                     | 4X3X4 | -14893.4265  | -14893.4283     | 0.0009 | 0.0008 | 0.1272                      |
| 5                     | 5X3X5 | -14893.4355  | -14893.4368     | 0.0001 | 0.0001 | 0.0090                      |
| 6                     | 5X4X5 | -14893.4499  | -14893.4509     | 0.0001 | 0.0001 | 0.0144                      |
| 7                     | 6X4X6 | -14893.4519  | -14893.4528     | 0.0000 | 0.0000 | 0.0020                      |
| 8                     | 7X5X7 | -14893.4570  | -14893.4576     | 0.0000 | 0.0000 | 0.0051                      |
| 9                     | 8X5X8 | -14893.4567  | -14893.4571     | 0.0000 | 0.0000 | -0.0004                     |
| 10                    | 8X6X8 | -14893.4578  | -14893.4582     | 0.0000 | 0.0000 | 0.0012                      |
| 11                    | 9X6X9 | -14893.4582  | -14893.4586     | 0.0000 | 0.0000 | 0.0004                      |
| 12                    | 9X7X9 | -14893.4587  | -14893.4590     | 0.0000 | 0.0000 | 0.0005                      |

| MgI2 |       |              | 440 Ry; 0.02 eV |        |        |                             |
|------|-------|--------------|-----------------|--------|--------|-----------------------------|
|      |       | Energy total | Free energy     | % ET   | % FE   | $\Delta E_{\text{(Total)}}$ |
| 1    | 1X1X1 | -2431.8427   | -2431.8427      |        |        |                             |
| 2    | 2X2X1 | -2440.2514   | -2440.2514      | 0.3458 | 0.3458 | 8.4087                      |
| 3    | 3X3X2 | -2440.9112   | -2440.9112      | 0.0270 | 0.0270 | 0.6598                      |
| 4    | 4X4X2 | -2441.0183   | -2441.0183      | 0.0044 | 0.0044 | 0.1070                      |
| 5    | 5X5X3 | -2441.0350   | -2441.0350      | 0.0007 | 0.0007 | 0.0168                      |
| 6    | 6X6X3 | -2441.0383   | -2441.0383      | 0.0001 | 0.0001 | 0.0033                      |
| 7    | 7X7X4 | -2441.0396   | -2441.0396      | 0.0001 | 0.0001 | 0.0012                      |
| 8    | 8X8X4 | -2441.0397   | -2441.0397      | 0.0000 | 0.0000 | 0.0002                      |
| 9    | 9X9X5 | -2441.0397   | -2441.0397      | 0.0000 | 0.0000 | 0.0000                      |
| 10   |       |              |                 |        |        |                             |
| 11   |       |              |                 |        |        |                             |
| 12   |       |              |                 |        |        |                             |

| CaI2 |       |              | 520 Ry; 0.02 eV |        |        |                             |
|------|-------|--------------|-----------------|--------|--------|-----------------------------|
|      |       | Energy total | Free energy     | % ET   | % FE   | $\Delta E_{\text{(Total)}}$ |
| 1    | 1X1X1 | -2470.5289   | -2470.5289      |        |        |                             |
| 2    | 2X2X1 | -2475.7840   | -2475.7840      | 0.2127 | 0.2127 | 5.2551                      |
| 3    | 3X3X2 | -2476.0637   | -2476.0637      | 0.0113 | 0.0113 | 0.2797                      |
| 4    | 4X4X2 | -2476.0986   | -2476.0986      | 0.0014 | 0.0014 | 0.0349                      |
| 5    | 5X5X3 | -2476.1023   | -2476.1023      | 0.0001 | 0.0001 | 0.0037                      |
| 6    | 6X6X3 | -2476.1030   | -2476.1030      | 0.0000 | 0.0000 | 0.0007                      |
| 7    | 7X7X4 | -2476.1032   | -2476.1032      | 0.0000 | 0.0000 | 0.0002                      |
| 8    | 8X8X4 | -2476.1032   | -2476.1032      | 0.0000 | 0.0000 | 0.0000                      |
| 9    | 9X9X5 | -2476.1032   | -2476.1032      | 0.0000 | 0.0000 | 0.0000                      |
| 10   |       |              |                 |        |        |                             |
| 11   |       |              |                 |        |        |                             |
| 12   |       |              |                 |        |        |                             |

| CsSn13 - Orthorhombic |              |             |             | 480 Ry; 6X4X6 |           |          |           |
|-----------------------|--------------|-------------|-------------|---------------|-----------|----------|-----------|
| PAOEnergyShift (eV)   | Energy total | Free energy | Calls       | SCF Time/call | Total     |          |           |
| 1                     | 0.02         | -14894.3327 | -14894.3327 | 0.00000       | 148.00000 | 1785.779 | 264295.29 |
| 2                     | 0.04         | -14893.3981 | -14893.3981 | 0.00000       | 292.00000 | 876.995  | 256082.54 |
| 3                     | 0.06         | -14892.6192 | -14892.6192 | 0.00000       | 425.00000 | 835.366  | 355030.55 |
| 4                     | 0.08         | -14892.0178 | -14892.0178 | 0.00000       | 296.00000 | 824.704  | 244112.38 |
| 5                     | 0.10         | -14891.2376 | -14891.2376 | 0.00000       | 243.00000 | 685.148  | 166490.96 |
| 6                     | 0.12         | -14890.2364 | -14890.2364 | 0.00000       | 183.00000 | 772.669  | 141398.43 |
| 7                     | 0.14         | -14889.2821 | -14889.2821 | 0.00000       | 181.00000 | 778.028  | 140823.07 |
| 8                     | 0.16         | -14888.7364 | -14888.7364 | 0.00000       | 210.00000 | 977.943  | 205368.03 |
| 9                     | 0.18         | -14887.0928 | -14887.0928 | 0.00000       | 221.00000 | 543.150  | 120036.15 |
| 10                    | 0.20         | -14886.9464 | -14886.9464 | 0.00000       | 212.00000 | 478.328  | 101405.54 |
| 11                    | 0.22         | -14885.6766 | -14885.6766 | 0.00000       | 167.00000 | 689.105  | 115080.54 |
| 12                    | 0.24         | -14884.9857 | -14884.9857 | 0.00000       | 170.00000 | 730.001  | 124100.17 |
| 13                    | 0.26         | -14882.9194 | -14882.9194 | 0.00001       | 226.00000 | 636.812  | 143919.51 |
| 14                    | 0.28         | -14882.9194 | -14882.9194 | 0.00001       | 226.00000 | 797.343  | 180199.52 |
| 15                    | 0.30         | -14880.2714 | -14880.2714 | 0.00005       | 205.00000 | 958.055  | 196401.28 |
| 16                    | 0.32         | -14880.0493 | -14880.0494 | 0.00008       | 184.00000 | 805.996  | 148303.26 |
| 17                    | 0.34         | -14879.7906 | -14879.7907 | 0.00010       | 220.00000 | 1405.342 | 309175.24 |

| 480 Ry; 6X4X6       |          |         |       |           |         |       |          |         |        |            |           |       |         |       | Standard |              |        |
|---------------------|----------|---------|-------|-----------|---------|-------|----------|---------|--------|------------|-----------|-------|---------|-------|----------|--------------|--------|
| PAOEnergyShift (eV) | a        | a - exp | error | b         | b - exp | error | c        | c - exp | error  | Prom error | deviation | a/c   | a/c exp | error | Volume/Z | Volume/Z exp | Error  |
| 0.02                | 9.149313 | 8.6885  | 5.304 | 12.936738 | 12.3775 | 4.518 | 8.952640 | 8.6384  | 3.638  | 4.487      | 0.833     | 1.022 | 1.006   | 1.608 | 264.9137 | 232.25       | 14.064 |
| 0.04                | 9.185956 | 8.6885  | 5.725 | 12.836905 | 12.3775 | 3.712 | 8.984334 | 8.6384  | 4.005  | 4.481      | 1.088     | 1.022 | 1.006   | 1.655 | 264.8565 | 232.25       | 14.039 |
| 0.06                | 9.136131 | 8.6885  | 5.152 | 12.870595 | 12.3775 | 3.984 | 8.962641 | 8.6384  | 3.753  | 4.296      | 0.750     | 1.019 | 1.006   | 1.348 | 263.4735 | 232.25       | 13.444 |
| 0.08                | 9.123395 | 8.6885  | 5.005 | 12.844817 | 12.3775 | 3.776 | 8.942903 | 8.6384  | 3.525  | 4.102      | 0.792     | 1.020 | 1.006   | 1.430 | 262.0010 | 232.25       | 12.810 |
| 0.10                | 9.128167 | 8.6885  | 5.060 | 12.785703 | 12.3775 | 3.298 | 8.896432 | 8.6384  | 2.987  | 3.782      | 1.118     | 1.026 | 1.006   | 2.013 | 259.5757 | 232.25       | 11.766 |
| 0.12                | 9.094133 | 8.6885  | 4.669 | 12.748477 | 12.3775 | 2.997 | 8.883348 | 8.6384  | 2.836  | 3.500      | 1.015     | 1.024 | 1.006   | 1.783 | 257.4757 | 232.25       | 10.861 |
| 0.14                | 9.039386 | 8.6885  | 4.039 | 12.688971 | 12.3775 | 2.516 | 8.880783 | 8.6384  | 2.806  | 3.120      | 0.808     | 1.018 | 1.006   | 1.199 | 254.6576 | 232.25       | 9.648  |
| 0.16                | 9.039031 | 8.6885  | 4.034 | 12.674873 | 12.3775 | 2.403 | 8.844907 | 8.6384  | 2.391  | 2.943      | 0.946     | 1.022 | 1.006   | 1.605 | 253.3871 | 232.25       | 9.101  |
| 0.18                | 8.995057 | 8.6885  | 3.528 | 12.599158 | 12.3775 | 1.791 | 8.793982 | 8.6384  | 1.801  | 2.373      | 1.000     | 1.023 | 1.006   | 1.697 | 249.1558 | 232.25       | 7.279  |
| 0.20                | 8.965805 | 8.6885  | 3.192 | 12.595241 | 12.3775 | 1.759 | 8.818495 | 8.6384  | 2.085  | 2.345      | 0.751     | 1.017 | 1.006   | 1.084 | 248.9604 | 232.25       | 7.195  |
| 0.22                | 8.906245 | 8.6885  | 2.506 | 12.545244 | 12.3775 | 1.355 | 8.803181 | 8.6384  | 1.908  | 1.923      | 0.576     | 1.012 | 1.006   | 0.587 | 245.8971 | 232.25       | 5.876  |
| 0.24                | 8.899775 | 8.6885  | 2.432 | 12.531255 | 12.3775 | 1.242 | 8.757213 | 8.6384  | 1.375  | 1.683      | 0.652     | 1.016 | 1.006   | 1.042 | 244.1628 | 232.25       | 5.129  |
| 0.26                | 8.876071 | 8.6885  | 2.159 | 12.462047 | 12.3775 | 0.683 | 8.697178 | 8.6384  | 0.680  | 1.174      | 0.853     | 1.021 | 1.006   | 1.468 | 240.5075 | 232.25       | 3.555  |
| 0.28                | 8.876071 | 8.6885  | 2.159 | 12.462047 | 12.3775 | 0.683 | 8.697178 | 8.6384  | 0.680  | 1.174      | 0.853     | 1.021 | 1.006   | 1.468 | 240.5075 | 232.25       | 3.555  |
| 0.30                | 8.822579 | 8.6885  | 1.543 | 12.416764 | 12.3775 | 0.317 | 8.629116 | 8.6384  | -0.107 | 0.656      | 0.857     | 1.022 | 1.006   | 1.652 | 236.3254 | 232.25       | 1.755  |
| 0.32                | 8.791082 | 8.6885  | 1.181 | 12.392219 | 12.3775 | 0.119 | 8.649468 | 8.6384  | 0.128  | 0.476      | 0.610     | 1.016 | 1.006   | 1.051 | 235.5705 | 232.25       | 1.430  |
| 0.34                | 8.784599 | 8.6885  | 1.106 | 12.409503 | 12.3775 | 0.259 | 8.635470 | 8.6384  | -0.034 | 0.466      | 0.592     | 1.017 | 1.006   | 1.140 | 235.3436 | 232.25       | 1.332  |

| 520 Ry; 7X5X7       |               |               |          |               |            |            |         |
|---------------------|---------------|---------------|----------|---------------|------------|------------|---------|
| PAOEnergyShift (eV) | Energy total  | Free energy   | Calls    | SCF Time/call | Total time | E_Fermi    |         |
| 0.20                | -14886.945719 | -14886.945719 | 0.000000 | 231           | 2012.833   | 464964.423 | -3.3784 |
| 0.22                | -14885.676861 | -14885.676861 | 0.000000 | 207           | 2022.959   | 418752.513 | -3.2660 |

| 520 Ry; 7X5X7       |          |         |       |           |         |       |          |         |       |            |           |       |         |       | Standard |              |       |
|---------------------|----------|---------|-------|-----------|---------|-------|----------|---------|-------|------------|-----------|-------|---------|-------|----------|--------------|-------|
| PAOEnergyShift (eV) | a        | a - exp | error | b         | b - exp | error | c        | c - exp | error | Prom error | deviation | a/c   | a/c exp | error | Volume/Z | Volume/Z exp | Error |
| 0.20                | 8.983605 | 8.6885  | 3.397 | 12.5912   | 12.3775 | 1.727 | 8.799056 | 8.6384  | 1.860 | 2.328      | 0.928     | 1.021 | 1.006   | 1.509 | 248.8249 | 232.25       | 7.137 |
| 0.22                | 8.909978 | 8.6885  | 2.549 | 12.552947 | 12.3775 | 1.417 | 8.793455 | 8.6384  | 1.795 | 1.921      | 0.576     | 1.013 | 1.006   | 0.741 | 245.8792 | 232.25       | 5.868 |

| 600 Ry; 7X5X7       |               |               |          |               |            |            |         |
|---------------------|---------------|---------------|----------|---------------|------------|------------|---------|
| PAOEnergyShift (eV) | Energy total  | Free energy   | Calls    | SCF Time/call | Total time | E_Fermi    |         |
| 0.20                | -14886.942326 | -14886.942326 | 0.000000 | 261           | 1967.263   | 513455.643 | -3.3864 |
| 0.22                | -14885.673173 | -14885.673173 | 0.000000 | 219           | 1191.795   | 261003.105 | -3.2725 |

| 600 Ry; 7X5X7       |          |         |       |           |         |       |          |         |       |            |           |       |         |       | Standard |              |       |
|---------------------|----------|---------|-------|-----------|---------|-------|----------|---------|-------|------------|-----------|-------|---------|-------|----------|--------------|-------|
| PAOEnergyShift (eV) | a        | a - exp | error | b         | b - exp | error | c        | c - exp | error | Prom error | deviation | a/c   | a/c exp | error | Volume/Z | Volume/Z exp | Error |
| 0.20                | 8.99663  | 8.6885  | 3.546 | 12.598181 | 12.3775 | 1.783 | 8.784417 | 8.6384  | 1.690 | 2.340      | 1.046     | 1.024 | 1.006   | 1.825 | 248.9090 | 232.25       | 7.173 |
| 0.22                | 8.924318 | 8.6885  | 2.714 | 12.546561 | 12.3775 | 1.366 | 8.791186 | 8.6384  | 1.769 | 1.950      | 0.692     | 1.015 | 1.006   | 0.929 | 246.0862 | 232.25       | 5.957 |

| Voronoi         |                 |                 |                 | Hirshfeld       |                 |                 |                 |
|-----------------|-----------------|-----------------|-----------------|-----------------|-----------------|-----------------|-----------------|
| 520Ry - 0.20 eV | 520Ry - 0.22 eV | 600Ry - 0.20 eV | 600Ry - 0.22 eV | 520Ry - 0.20 eV | 520Ry - 0.22 eV | 600Ry - 0.20 eV | 600Ry - 0.22 eV |
| 0.275           | 0.260           | 0.276           | 0.261           | 0.229           | 0.216           | 0.230           | 0.216           |
| -0.150          | -0.141          | -0.150          | -0.141          | -0.121          | -0.112          | -0.121          | -0.113          |
| -0.149          | -0.141          | -0.150          | -0.141          | -0.123          | -0.115          | -0.123          | -0.115          |
| 0.175           | 0.162           | 0.174           | 0.162           | 0.137           | 0.124           | 0.136           | 0.124           |
| 0.004           | -0.004          | 0.000           | 0.000           | 0.004           | 0.004           | 0.004           | -0.004          |

| 600 Ry; 7X5X7; 0.22 eV |               |               |       |               |             |         |          |         |        |            |                    |       |         |        |          |              |        |
|------------------------|---------------|---------------|-------|---------------|-------------|---------|----------|---------|--------|------------|--------------------|-------|---------|--------|----------|--------------|--------|
| Functional             | Energy total  | Free energy   | Calls | SCF Time/call | Total time  | E_Fermi |          |         |        |            |                    |       |         |        |          |              |        |
| PBE                    | -14871.859633 | -14871.859633 | 327   | 1278.214      | 417975.978  | -3.3065 |          |         |        |            |                    |       |         |        |          |              |        |
| RPBE                   | -14890.993393 | -14890.993393 | 226   | 1199.153      | 271008.578  | -3.2435 |          |         |        |            |                    |       |         |        |          |              |        |
| PBEsol                 | -14774.402013 | -14774.402013 | 1009  | 1133.341      | 1143541.069 | -3.4438 |          |         |        |            |                    |       |         |        |          |              |        |
| WC                     | -14833.153620 | -14833.153620 | 465   | 1541.793      | 716933.745  | -3.4435 |          |         |        |            |                    |       |         |        |          |              |        |
| Functional             | a             | a - exp       | error | b             | b - exp     | error   | c        | c - exp | error  | Prom error | Standard deviation | a/c   | a/c exp | error  | Volume/Z | Volume/Z exp | Error  |
| PBE                    | 8.985193      | 8.6885        | 3.415 | 12.415199     | 12.3775     | 0.305   | 8.421892 | 8.6384  | -2.506 | 2.075      | 2.962              | 1.067 | 1.006   | 6.073  | 234.8718 | 232.25       | 1.129  |
| RPBE                   | 8.921279      | 8.6885        | 2.679 | 12.596974     | 12.3775     | 1.773   | 8.843677 | 8.6384  | 2.376  | 2.276      | 0.461              | 1.009 | 1.006   | 0.296  | 248.4656 | 232.25       | 6.982  |
| PBEsol                 | 9.066314      | 8.6885        | 4.348 | 12.314073     | 12.3775     | -0.512  | 7.842087 | 8.6384  | -9.218 | 4.693      | 6.874              | 1.156 | 1.006   | 14.944 | 248.9090 | 232.25       | 7.173  |
| WC                     | 9.058197      | 8.6885        | 4.255 | 12.313587     | 12.3775     | -0.516  | 7.898122 | 8.6384  | -8.570 | 4.447      | 6.482              | 1.147 | 1.006   | 14.027 | 220.2370 | 232.25       | -5.172 |

| Voronoi |        |        |        | Hirshfeld |        |        |        |
|---------|--------|--------|--------|-----------|--------|--------|--------|
| PBE     | RPBE   | PBEsol | WC     | PBE       | RPBE   | PBEsol | WC     |
| 0.244   | 0.265  | 0.226  | 0.229  | 0.200     | 0.220  | 0.182  | 0.185  |
| -0.126  | -0.145 | -0.107 | -0.109 | -0.095    | -0.117 | -0.077 | -0.078 |
| -0.124  | -0.146 | -0.098 | -0.100 | -0.098    | -0.119 | -0.071 | -0.073 |
| 0.131   | 0.171  | 0.086  | 0.088  | 0.088     | 0.133  | 0.042  | 0.043  |
| -0.004  | 0.000  | 0.000  | -0.004 | 0.000     | 0.000  | -0.004 | -0.004 |

| Mg12                |              |             |            | 440 Ry; 6X6X3 |               |        |         |
|---------------------|--------------|-------------|------------|---------------|---------------|--------|---------|
| PAOEnergyShift (eV) | Energy total | Free energy |            | Calls         | SCF Time/call | Total  |         |
| 1                   | 0.02         | -2441.1884  | -2441.1884 | 0.00000       | 93.00         | 48.508 | 4511.24 |
| 2                   | 0.04         | -2441.1244  | -2441.1244 | 0.00000       | 151.00        | 41.146 | 6213.05 |
| 3                   | 0.06         | -2441.0779  | -2441.0779 | 0.00000       | 127.00        | 40.084 | 5090.67 |
| 4                   | 0.08         | -2440.9977  | -2440.9977 | 0.00000       | 126.00        | 37.550 | 4731.30 |
| 5                   | 0.10         | -2440.9025  | -2440.9025 | 0.00000       | 122.00        | 25.203 | 3074.77 |
| 6                   | 0.12         | -2440.7708  | -2440.7708 | 0.00000       | 119.00        | 35.76  | 4255.44 |
| 7                   | 0.14         | -2440.6390  | -2440.6390 | 0.00000       | 78.00         | 38.643 | 3014.15 |
| 8                   | 0.16         | -2440.5721  | -2440.5721 | 0.00000       | 78.00         | 51.172 | 3991.42 |
| 9                   | 0.18         | -2440.3392  | -2440.3392 | 0.00000       | 106.00        | 40.424 | 4284.94 |
| 10                  | 0.20         | -2440.3149  | -2440.3149 | 0.00000       | 131.00        | 31.753 | 4159.64 |
| 11                  | 0.22         | -2440.0972  | -2440.0972 | 0.00000       | 97.00         | 25.387 | 2462.54 |
| 12                  | 0.24         | -2440.0056  | -2440.0056 | 0.00000       | 85.00         | 35.842 | 3046.57 |
| 13                  | 0.26         |             |            | 0.00000       |               |        | 0.00    |
| 14                  | 0.28         |             |            | 0.00000       |               |        | 0.00    |
| 15                  | 0.30         |             |            | 0.00000       |               |        | 0.00    |
| 16                  | 0.32         |             |            | 0.00000       |               |        | 0.00    |
| 17                  | 0.34         |             |            | 0.00000       |               |        | 0.00    |

| 440 Ry; 6X6X3       |          |         |          |          |        |          |            |           |          | Standard |       |          |              |        |          |        |          |
|---------------------|----------|---------|----------|----------|--------|----------|------------|-----------|----------|----------|-------|----------|--------------|--------|----------|--------|----------|
| PAOEnergyShift (eV) | a        | a - exp | b        | b - exp  | c      | c - exp  | Prom error | deviation | c/a      | c/a exp  | error | Volume/Z | Volume/Z exp | Error  |          |        |          |
| 0.02                | 4.397158 | 4.1537  | 5.861    | 4.397155 | 4.1537 | 5.861    | 7.176313   | 6.862     | 4.580    | 5.434    | 0.739 | 1.632    | 1.652        | -1.210 | 120.1378 | 102.53 | 17.173   |
| 0.04                | 4.394197 | 4.1537  | 5.790    | 4.394195 | 4.1537 | 5.790    | 7.172169   | 6.862     | 4.520    | 5.367    | 0.733 | 1.632    | 1.652        | -1.200 | 119.9068 | 102.53 | 16.948   |
| 0.06                | 4.345005 | 4.1537  | 4.606    | 4.344970 | 4.1537 | 4.605    | 7.290905   | 6.862     | 6.250    | 5.154    | 0.950 | 1.678    | 1.652        | 1.572  | 119.1669 | 102.53 | 16.226   |
| 0.08                | 4.346962 | 4.1537  | 4.653    | 4.346961 | 4.1537 | 4.653    | 7.132049   | 6.862     | 3.935    | 4.414    | 0.414 | 1.641    | 1.652        | -0.685 | 116.6897 | 102.53 | 13.810   |
| 0.10                | 4.324385 | 4.1537  | 4.109    | 4.324385 | 4.1537 | 4.109    | 7.103570   | 6.862     | 3.520    | 3.913    | 0.340 | 1.643    | 1.652        | -0.566 | 115.0198 | 102.53 | 12.182   |
| 0.12                | 4.297333 | 4.1537  | 3.458    | 4.297331 | 4.1537 | 3.458    | 7.067815   | 6.862     | 2.999    | 3.305    | 0.265 | 1.645    | 1.652        | -0.443 | 113.0158 | 102.53 | 10.227   |
| 0.14                | 4.268503 | 4.1537  | 2.764    | 4.268502 | 4.1537 | 2.764    | 7.030603   | 6.862     | 2.457    | 2.662    | 0.177 | 1.647    | 1.652        | -0.299 | 110.9152 | 102.53 | 8.178    |
| 0.16                | 4.260140 | 4.1537  | 2.563    | 4.260139 | 4.1537 | 2.563    | 7.020315   | 6.862     | 2.307    | 2.477    | 0.147 | 1.648    | 1.652        | -0.249 | 110.3210 | 102.53 | 7.599    |
| 0.18                | 4.207751 | 4.1537  | 1.301    | 4.207746 | 4.1537 | 1.301    | 7.053679   | 6.862     | 2.793    | 1.799    | 0.861 | 1.676    | 1.652        | 1.473  | 108.1175 | 102.53 | 5.450    |
| 0.20                | 4.203072 | 4.1537  | 1.189    | 4.203084 | 4.1537 | 1.189    | 7.086787   | 6.862     | 3.276    | 1.884    | 1.205 | 1.686    | 1.652        | 2.063  | 108.3860 | 102.53 | 5.711    |
| 0.22                | 4.187689 | 4.1537  | 0.818    | 4.187688 | 4.1537 | 0.818    | 6.902964   | 6.862     | 0.597    | 0.745    | 0.128 | 1.648    | 1.652        | -0.220 | 104.8203 | 102.53 | 2.234    |
| 0.24                | 4.182426 | 4.1537  | 0.692    | 4.182426 | 4.1537 | 0.692    | 6.886624   | 6.862     | 0.359    | 0.581    | 0.192 | 1.647    | 1.652        | -0.330 | 104.3115 | 102.53 | 1.738    |
| 0.26                |          | 4.1537  | -100.000 |          | 4.1537 | -100.000 |            | 6.862     | -100.000 | 100.000  | 0.000 | #jDIV/0! |              |        | 102.53   |        | -100.000 |
| 0.28                |          | 4.1537  | -100.000 |          | 4.1537 | -100.000 |            | 6.862     | -100.000 | 100.000  | 0.000 | #jDIV/0! |              |        | 102.53   |        | -100.000 |
| 0.30                |          | 4.1537  | -100.000 |          | 4.1537 | -100.000 |            | 6.862     | -100.000 | 100.000  | 0.000 | #jDIV/0! |              |        | 102.53   |        | -100.000 |
| 0.32                |          | 4.1537  | -100.000 |          | 4.1537 | -100.000 |            | 6.862     | -100.000 | 100.000  | 0.000 | #jDIV/0! |              |        | 102.53   |        | -100.000 |
| 0.34                |          | 4.1537  | -100.000 |          | 4.1537 | -100.000 |            | 6.862     | -100.000 | 100.000  | 0.000 | #jDIV/0! |              |        | 102.53   |        | -100.000 |

| 600 Ry; 7X7X4; 0.22 eV |              |              |       |              |           |         |          | Standard   |           |       |         |       |          |              |          |        |       |
|------------------------|--------------|--------------|-------|--------------|-----------|---------|----------|------------|-----------|-------|---------|-------|----------|--------------|----------|--------|-------|
| PAOEnergyShift (eV)    | Energy total | Free energy  | Calls | SCF Time/cal | Total     | E_Fermi |          | Prom error | deviation | c/a   | c/a exp | error | Volume/Z | Volume/Z exp | Error    |        |       |
| revPBE                 | -2440.095087 | -2440.095087 | 93    | 127.209      | 11830.437 | -4.5565 |          |            |           |       |         |       |          |              |          |        |       |
| RPBE                   | -2441.054552 | -2441.054552 | 100   | 26.392       | 2639.2    | -4.6915 |          |            |           |       |         |       |          |              |          |        |       |
| revPBE                 | 4.187449     | 4.1537       | 0.813 | 4.187449     | 4.1537    | 0.813   | 6.902502 | 6.862      | 0.590     | 0.738 | 0.128   | 1.648 | 1.652    | -0.220       | 104.8105 | 102.53 | 2.224 |
| RPBE                   | 4.208537     | 4.1537       | 1.320 | 4.208538     | 4.1537    | 1.320   | 6.923057 | 6.862      | 0.890     | 1.177 | 0.249   | 1.645 | 1.652    | -0.425       | 106.1834 | 102.53 | 3.563 |

| Atom | Voronoi |        | Hirshfeld |        |
|------|---------|--------|-----------|--------|
|      | revPBE  | RPBE   | revPBE    | RPBE   |
| Mg   | 0.227   | 0.220  | 0.171     | 0.166  |
| I_1  | -0.113  | -0.110 | -0.086    | -0.083 |
| I_2  | -0.113  | -0.110 | -0.086    | -0.083 |
| SUMA | 0.001   | 0.000  | -0.001    | 0.000  |

| CaI2                |              |             |            |               |        | 440 Ry; 6X6X3 |          |  |
|---------------------|--------------|-------------|------------|---------------|--------|---------------|----------|--|
| PAOEnergyShift (eV) | Energy total | Free energy | Calls      | SCF Time/call | Total  |               |          |  |
| 1                   | 0.02         | -2476.6381  | -2476.6381 | 0.00000       | 449.00 | 54.067        | 24276.08 |  |
| 2                   | 0.04         | -2476.5154  | -2476.5154 | 0.00000       | 293.00 | 48.793        | 14296.35 |  |
| 3                   | 0.06         | -2476.4243  | -2476.4243 | 0.00000       | 165.00 | 38.809        | 6403.49  |  |
| 4                   | 0.08         | -2476.3286  | -2476.3286 | 0.00000       | 168.00 | 36.066        | 6059.09  |  |
| 5                   | 0.10         | -2476.1984  | -2476.1984 | 0.00000       | 207.00 | 80.865        | 16739.06 |  |
| 6                   | 0.12         | -2476.0121  | -2476.0121 | 0.00000       | 149.00 | 81.417        | 12131.13 |  |
| 7                   | 0.14         | -2475.8397  | -2475.8397 | 0.00000       | 145.00 | 36.350        | 5270.75  |  |
| 8                   | 0.16         | -2475.7671  | -2475.7671 | 0.00000       | 111.00 | 32.102        | 3563.32  |  |
| 9                   | 0.18         | -2475.4354  | -2475.4354 | 0.00000       | 113.00 | 83.151        | 9396.06  |  |
| 10                  | 0.20         | -2475.4354  | -2475.4354 | 0.00000       | 112.00 | 32.947        | 3690.06  |  |
| 11                  | 0.22         | -2475.1597  | -2475.1597 | 0.00000       | 103.00 | 40.085        | 4128.76  |  |
| 12                  | 0.24         |             |            | 0.00000       | 98.00  | 28.764        | 2818.87  |  |
| 13                  | 0.26         |             |            | 0.00000       |        |               | 0.00     |  |
| 14                  | 0.28         |             |            | 0.00000       |        |               | 0.00     |  |
| 15                  | 0.30         |             |            | 0.00000       |        |               | 0.00     |  |
| 16                  | 0.32         |             |            | 0.00000       |        |               | 0.00     |  |
| 17                  | 0.34         |             |            | 0.00000       |        |               | 0.00     |  |

| 440 Ry; 6X6X3       |          |         |          |          |        |          |            |           |          | Standard deviation |       |          |              |          |          |        |          |
|---------------------|----------|---------|----------|----------|--------|----------|------------|-----------|----------|--------------------|-------|----------|--------------|----------|----------|--------|----------|
| PAOEnergyShift (eV) | a        | a - exp | b        | b - exp  | c      | c - exp  | Prom error | deviation | c/a      | c/a exp            | error | Volume/Z | Volume/Z exp | Error    |          |        |          |
| 0.02                | 4.912886 | 4.4900  | 9.418    | 4.912849 | 4.4900 | 9.418    | 8.797170   | 6.975     | 26.124   | 14.987             | 9.645 | 1.791    | 1.553        | 15.268   | 183.7357 | 121.78 | 50.875   |
| 0.04                | 4.966268 | 4.4900  | 10.607   | 4.966269 | 4.4900 | 10.607   | 7.355761   | 6.975     | 5.459    | 8.891              | 2.972 | 1.481    | 1.553        | -4.655   | 157.0977 | 121.78 | 29.001   |
| 0.06                | 4.916090 | 4.4900  | 9.490    | 4.916090 | 4.4900 | 9.490    | 7.335510   | 6.975     | 5.169    | 8.049              | 2.495 | 1.492    | 1.553        | -3.947   | 153.5147 | 121.78 | 26.059   |
| 0.08                | 4.885560 | 4.4900  | 8.810    | 4.885560 | 4.4900 | 8.810    | 7.320618   | 6.975     | 4.955    | 7.525              | 2.226 | 1.498    | 1.553        | -3.543   | 151.3069 | 121.78 | 24.246   |
| 0.10                | 4.827945 | 4.4900  | 7.527    | 4.827951 | 4.4900 | 7.527    | 7.495836   | 6.975     | 7.467    | 7.507              | 0.034 | 1.553    | 1.553        | -0.055   | 151.2724 | 121.78 | 24.218   |
| 0.12                | 4.787502 | 4.4900  | 6.626    | 4.787501 | 4.4900 | 6.626    | 7.375006   | 6.975     | 5.735    | 6.329              | 0.514 | 1.540    | 1.553        | -0.836   | 146.3617 | 121.78 | 20.185   |
| 0.14                | 4.753093 | 4.4900  | 5.860    | 4.753078 | 4.4900 | 5.859    | 7.314208   | 6.975     | 4.863    | 5.527              | 0.575 | 1.539    | 1.553        | -0.941   | 143.0689 | 121.78 | 17.481   |
| 0.16                | 4.748092 | 4.4900  | 5.748    | 4.748088 | 4.4900 | 5.748    | 7.201238   | 6.975     | 3.244    | 4.913              | 1.446 | 1.517    | 1.553        | -2.368   | 140.5848 | 121.78 | 15.442   |
| 0.18                | 4.697930 | 4.4900  | 4.631    | 4.697929 | 4.4900 | 4.631    | 7.136331   | 6.975     | 2.313    | 3.858              | 1.338 | 1.519    | 1.553        | -2.215   | 136.3897 | 121.78 | 11.997   |
| 0.20                | 4.697927 | 4.4900  | 4.631    | 4.697927 | 4.4900 | 4.631    | 7.136336   | 6.975     | 2.313    | 3.858              | 1.338 | 1.519    | 1.553        | -2.215   | 136.3896 | 121.78 | 11.997   |
| 0.22                | 4.659164 | 4.4900  | 3.768    | 4.659162 | 4.4900 | 3.768    | 7.074175   | 6.975     | 1.422    | 2.986              | 1.354 | 1.518    | 1.553        | -2.261   | 132.9790 | 121.78 | 9.196    |
| 0.24                | 4.654416 | 4.4900  | 3.662    | 4.654418 | 4.4900 | 3.662    | 7.055921   | 6.975     | 1.160    | 2.828              | 1.444 | 1.516    | 1.553        | -2.413   | 132.3681 | 121.78 | 8.694    |
| 0.26                |          | 4.4900  | -100.000 |          | 4.4900 | -100.000 |            | 6.975     | -100.000 | 100.000            | 0.000 | #jDIV/0! | 1.553        | #jDIV/0! |          | 121.78 | -100.000 |
| 0.28                |          | 4.4900  | -100.000 |          | 4.4900 | -100.000 |            | 6.975     | -100.000 | 100.000            | 0.000 | #jDIV/0! | 1.553        | #jDIV/0! |          | 121.78 | -100.000 |
| 0.30                |          | 4.4900  | -100.000 |          | 4.4900 | -100.000 |            | 6.975     | -100.000 | 100.000            | 0.000 | #jDIV/0! |              |          |          | 121.78 | -100.000 |
| 0.32                |          | 4.4900  | -100.000 |          | 4.4900 | -100.000 |            | 6.975     | -100.000 | 100.000            | 0.000 | #jDIV/0! |              |          |          | 121.78 | -100.000 |
| 0.34                |          | 4.4900  | -100.000 |          | 4.4900 | -100.000 |            | 6.975     | -100.000 | 100.000            | 0.000 | #jDIV/0! |              |          |          | 121.78 | -100.000 |

| 600 Ry; 7X7X4; 0.22 eV |              |              |       |              |           |         |          |         |       | Standard deviation |           |       |         |        |          |              |       |
|------------------------|--------------|--------------|-------|--------------|-----------|---------|----------|---------|-------|--------------------|-----------|-------|---------|--------|----------|--------------|-------|
| PAOEnergyShift (eV)    | Energy total | Free energy  | Calls | SCF Time/cal | Total     | E_Fermi |          |         |       |                    |           |       |         |        |          |              |       |
| revPBE                 | -2475.159982 | -2475.159982 | 79    | 154.5140     | 12206.606 |         |          |         |       |                    |           |       |         |        |          |              |       |
| RPBE                   | -2476.104605 | -2476.104605 | 72    | 155.7450     | 11213.64  |         |          |         |       |                    |           |       |         |        |          |              |       |
| PAOEnergyShift (eV)    | a            | a - exp      | error | b            | b - exp   | error   | c        | c - exp | error | Prom error         | deviation | c/a   | c/a exp | error  | Volume/Z | Volume/Z exp | Error |
| revPBE                 | 4.657130     | 4.4900       | 3.722 | 4.657132     | 4.4900    | 3.722   | 7.073561 | 6.975   | 1.413 | 2.953              | 1.333     | 1.519 | 1.553   | -2.226 | 132.8538 | 121.78       | 9.093 |
| RPBE                   | 4.666776     | 4.4900       | 3.937 | 4.666775     | 4.4900    | 3.937   | 7.091708 | 6.975   | 1.673 | 3.182              | 1.307     | 1.520 | 1.553   | -2.178 | 133.7476 | 121.78       | 9.827 |

| Atom | Voronoi |        | Hirshfeld |        |
|------|---------|--------|-----------|--------|
|      | revPBE  | RPBE   | revPBE    | RPBE   |
| Ca   | 0.321   | 0.329  | 0.232     | 0.238  |
| I_1  | -0.160  | -0.164 | -0.116    | -0.119 |
| I_2  | -0.160  | -0.164 | -0.116    | -0.119 |
| SUMA | 0.001   | 0.001  | 0.000     | 0.000  |

| Structural data                                     |                |          |          |                             |                           |
|-----------------------------------------------------|----------------|----------|----------|-----------------------------|---------------------------|
| CsSnI3 - Bonds - Optimized structure                |                |          |          |                             |                           |
|                                                     | revPBE (Å)     | RPBE (Å) | Exp. (Å) | revPBE - Relative error (%) | RPBE - Relative error (%) |
| <b>Bond length</b>                                  |                |          |          |                             |                           |
| Sn-I apical                                         | 3.192          | 3.201    |          | 2.340                       | 2.629                     |
|                                                     | 3.191          | 3.200    |          | 2.308                       | 2.597                     |
|                                                     | 3.192          | 3.201    |          | 2.340                       | 2.629                     |
|                                                     | 3.191          | 3.200    | 3.119    | 2.308                       | 2.597                     |
|                                                     | 3.192          | 3.201    |          | 2.340                       | 2.629                     |
|                                                     | 3.191          | 3.200    |          | 2.308                       | 2.597                     |
|                                                     | 3.192          | 3.201    |          | 2.340                       | 2.629                     |
|                                                     | 3.191          | 3.200    |          | 2.308                       | 2.597                     |
| Mean value                                          | <b>3.192</b>   | 3.201    |          | <b>2.324</b>                | <b>2.613</b>              |
| Sn-I equatorial                                     | 3.203          | 3.209    |          | 2.529                       | 2.721                     |
|                                                     | 3.205          | 3.210    |          | 2.593                       | 2.753                     |
|                                                     | 3.202          | 3.209    |          | 2.497                       | 2.721                     |
|                                                     | 3.205          | 3.209    |          | 2.593                       | 2.721                     |
|                                                     | 3.203          | 3.209    |          | 2.529                       | 2.721                     |
|                                                     | 3.205          | 3.209    |          | 2.529                       | 2.721                     |
|                                                     | 3.203          | 3.209    | 3.124    | 2.593                       | 2.753                     |
|                                                     | 3.203          | 3.209    |          | 2.529                       | 2.721                     |
|                                                     | 3.205          | 3.210    |          | 2.593                       | 2.753                     |
|                                                     | 3.203          | 3.209    |          | 2.529                       | 2.721                     |
|                                                     | 3.205          | 3.209    |          | 2.529                       | 2.721                     |
|                                                     | 3.203          | 3.209    |          | 2.593                       | 2.753                     |
|                                                     | 3.203          | 3.209    |          | 2.529                       | 2.721                     |
|                                                     | 3.205          | 3.210    |          | 2.593                       | 2.753                     |
|                                                     | 3.203          | 3.209    |          | 2.529                       | 2.721                     |
|                                                     | 3.205          | 3.209    |          | 2.593                       | 2.753                     |
|                                                     | 3.203          | 3.209    |          | 2.529                       | 2.721                     |
| Mean value                                          | <b>3.204</b>   | 3.209    |          | <b>2.559</b>                | <b>2.729</b>              |
| <b>Angles</b>                                       |                |          |          |                             |                           |
| Sn-I apical                                         | 158.719        | 159.478  |          | -4.386                      | -3.929                    |
|                                                     | 158.715        | 159.480  | 166.000  | -4.389                      | -3.928                    |
|                                                     | 158.719        | 159.486  |          | -4.386                      | -3.924                    |
|                                                     | 158.716        | 159.481  |          | -4.388                      | -3.927                    |
| Mean value                                          | <b>158.717</b> | 159.481  |          | <b>-4.387</b>               | <b>-3.927</b>             |
| Sn-I equatorial                                     | 155.614        | 156.236  |          | -1.260                      | -0.865                    |
|                                                     | 155.616        | 156.233  |          | -1.259                      | -0.867                    |
|                                                     | 155.616        | 156.232  |          | -1.259                      | -0.868                    |
|                                                     | 155.617        | 156.237  | 157.600  | -1.258                      | -0.865                    |
|                                                     | 155.630        | 156.249  |          | -1.250                      | -0.857                    |
|                                                     | 155.631        | 156.250  |          | -1.249                      | -0.857                    |
|                                                     | 155.631        | 156.249  |          | -1.249                      | -0.857                    |
|                                                     | 155.632        | 156.250  |          | -1.249                      | -0.857                    |
| Mean value                                          | <b>155.623</b> | 156.242  |          | <b>-1.254</b>               | <b>-0.862</b>             |
| <b>CsSnI3 - Cell dimensions - FINE Optimization</b> |                |          |          |                             |                           |
|                                                     | revPBE (Å)     | RPBE (Å) | Exp. (Å) | revPBE - Relative error (%) | RPBE - Relative error (%) |
| <b>Lattice constants</b>                            |                |          |          |                             |                           |
| a                                                   | 8.92           | 8.921    | 8.689    | 2.71                        | 2.679                     |
| b                                                   | 12.55          | 12.597   | 12.378   | 1.37                        | 1.773                     |
| c                                                   | 8.79           | 8.844    | 8.638    | 1.77                        | 2.376                     |
| Mean error                                          |                |          |          | <b>1.950</b>                | <b>2.276</b>              |
| α                                                   | 90.000         | 90.000   | 90.000   | 0.000                       | 0.000                     |
| β                                                   | 90.000         | 90.002   | 90.000   | 0.000                       | 0.002                     |
| γ                                                   | 90.000         | 90.000   | 90.000   | 0.000                       | 0.000                     |
| Mean error                                          |                |          |          | <b>0.000</b>                | <b>0.001</b>              |
| Volume                                              | 984.34         | 993.862  | 928.990  | <b>5.96</b>                 | <b>6.983</b>              |

| Structural data                                            |             |             |             |          |                              |                              |                              |
|------------------------------------------------------------|-------------|-------------|-------------|----------|------------------------------|------------------------------|------------------------------|
| CsSn3 - w/Grimme corrections - Bonds - Optimized structure |             |             |             |          |                              |                              |                              |
|                                                            | Grimme1 (Å) | Grimme2 (Å) | Grimme3 (Å) | Exp. (Å) | Grimme1 - Relative error (%) | Grimme2 - Relative error (%) | Grimme3 - Relative error (%) |
| <b>Bond lenght</b>                                         |             |             |             |          |                              |                              |                              |
| Sn-I apical                                                | 3.170       | 3.171       | 3.169       |          | 1.635                        | 1.667                        | 1.603                        |
|                                                            | 3.170       | 3.171       | 3.168       |          | 1.635                        | 1.667                        | 1.571                        |
|                                                            | 3.170       | 3.171       | 3.169       |          | 1.635                        | 1.667                        | 1.603                        |
|                                                            | 3.170       | 3.171       | 3.169       | 3.119    | 1.635                        | 1.667                        | 1.603                        |
|                                                            | 3.170       | 3.171       | 3.169       |          | 1.635                        | 1.667                        | 1.603                        |
|                                                            | 3.170       | 3.171       | 3.169       |          | 1.635                        | 1.667                        | 1.603                        |
|                                                            | 3.170       | 3.172       | 3.169       |          | 1.635                        | 1.699                        | 1.603                        |
| Mean value                                                 | 3.170       | 3.171       | 3.169       |          | <b>1.635</b>                 | <b>1.675</b>                 | <b>1.599</b>                 |
| Sn-I equatorial                                            | 3.178       | 3.179       | 3.180       |          | 1.729                        | 1.761                        | 1.793                        |
|                                                            | 3.199       | 3.199       | 3.195       |          | 2.401                        | 2.401                        | 2.273                        |
|                                                            | 3.178       | 3.180       | 3.180       |          | 1.729                        | 1.793                        | 1.793                        |
|                                                            | 3.199       | 3.200       | 3.196       |          | 2.401                        | 2.433                        | 2.305                        |
|                                                            | 3.178       | 3.179       | 3.178       |          | 1.729                        | 1.761                        | 1.729                        |
|                                                            | 3.200       | 3.199       | 3.198       |          | 2.433                        | 2.401                        | 2.369                        |
|                                                            | 3.178       | 3.181       | 3.178       |          | 1.729                        | 1.825                        | 1.729                        |
|                                                            | 3.200       | 3.199       | 3.198       | 3.124    | 2.433                        | 2.401                        | 2.369                        |
|                                                            | 3.178       | 3.178       | 3.177       |          | 1.729                        | 1.729                        | 1.697                        |
|                                                            | 3.199       | 3.200       | 3.198       |          | 2.401                        | 2.433                        | 2.369                        |
|                                                            | 3.178       | 3.178       | 3.177       |          | 1.729                        | 1.729                        | 1.697                        |
|                                                            | 3.199       | 3.201       | 3.199       |          | 2.401                        | 2.465                        | 2.401                        |
|                                                            | 3.200       | 3.200       | 3.201       |          | 2.433                        | 2.433                        | 2.465                        |
|                                                            | 3.178       | 3.179       | 3.174       |          | 1.729                        | 1.761                        | 1.601                        |
|                                                            | 3.200       | 3.201       | 3.201       |          | 2.433                        | 2.465                        | 2.465                        |
|                                                            | 3.178       | 3.178       | 3.175       |          | 1.729                        | 1.729                        | 1.633                        |
| Mean value                                                 | 3.189       | 3.189       | 3.188       |          | <b>2.073</b>                 | <b>2.095</b>                 | <b>2.043</b>                 |
| <b>Angles</b>                                              |             |             |             |          |                              |                              |                              |
| Sn-I apical                                                | 160.803     | 160.896     | 160.996     |          | -3.131                       | -3.075                       | -3.014                       |
|                                                            | 160.805     | 160.867     | 161.005     | 166.000  | -3.130                       | -3.092                       | -3.009                       |
|                                                            | 160.806     | 160.846     | 160.953     |          | -3.129                       | -3.105                       | -3.040                       |
|                                                            | 160.804     | 160.833     | 160.944     |          | -3.130                       | -3.113                       | -3.046                       |
| Mean value                                                 | 160.805     | 160.861     | 160.975     |          | <b>-3.130</b>                | <b>-3.096</b>                | <b>-3.027</b>                |
| Sn-I equatorial                                            | 146.097     | 145.876     | 146.308     |          | -7.299                       | -7.439                       | -7.165                       |
|                                                            | 146.095     | 145.907     | 146.303     |          | -7.300                       | -7.419                       | -7.168                       |
|                                                            | 146.072     | 145.848     | 146.220     |          | -7.315                       | -7.457                       | -7.221                       |
|                                                            | 146.070     | 145.848     | 146.240     | 157.600  | -7.316                       | -7.457                       | -7.208                       |
|                                                            | 146.095     | 145.903     | 146.213     |          | -7.300                       | -7.422                       | -7.225                       |
|                                                            | 146.095     | 145.895     | 146.231     |          | -7.300                       | -7.427                       | -7.214                       |
|                                                            | 146.072     | 145.847     | 146.151     |          | -7.315                       | -7.457                       | -7.265                       |
|                                                            | 146.071     | 145.866     | 146.143     |          | -7.315                       | -7.445                       | -7.270                       |
| Mean value                                                 | 146.083     | 145.874     | 146.226     |          | <b>-7.308</b>                | <b>-7.441</b>                | <b>-7.217</b>                |
| CsSn3 - Cell dimensions - FINE Optimization - revPBE       |             |             |             |          |                              |                              |                              |
|                                                            | Grimme1     | Grimme2     | Grimme3     | Exp. (Å) | Grimme1 - Relative error (%) | Grimme2 - Relative error (%) | Grimme3 - Relative error (%) |
| <b>Lattice constants</b>                                   |             |             |             |          |                              |                              |                              |
| a                                                          | 9.20        | 9.21        | 9.20        | 8.69     | 5.92                         | 6.00                         | 5.91                         |
| b                                                          | 12.50       | 12.51       | 12.50       | 12.38    | 1.01                         | 1.06                         | 1.00                         |
| c                                                          | 8.01        | 8.00        | 8.01        | 8.64     | -7.28                        | -7.44                        | -7.26                        |
| Mean error                                                 |             |             |             |          | <b>4.74</b>                  | <b>4.83</b>                  | <b>4.72</b>                  |
| α                                                          | 90.00       | 90.00       | 90.00       | 90.00    | 0.00                         | 0.00                         | 0.00                         |
| β                                                          | 90.00       | 89.99       | 90.00       | 90.00    | 0.00                         | -0.01                        | 0.00                         |
| γ                                                          | 90.00       | 90.00       | 90.00       | 90.00    | 0.00                         | 0.00                         | 0.00                         |
| Mean error                                                 |             |             |             |          | <b>0.00</b>                  | <b>0.01</b>                  | <b>0.00</b>                  |
| Volume                                                     | 921.60      | 921.13      | 921.66      | 928.99   | <b>-0.80</b>                 | <b>-0.85</b>                 | <b>-0.79</b>                 |



| Structural data                                                |        |        |        |        |        |
|----------------------------------------------------------------|--------|--------|--------|--------|--------|
| Mg-doped perovskite - Bonds - Optimized structure              |        |        |        |        |        |
|                                                                | Mg1    | Mg2    | Mg3    | Mg4    |        |
| <b>Bond length</b>                                             |        |        |        |        |        |
| Sn-I apical                                                    | 3.19   |        | 3.16   | 3.12   | 3.15   |
|                                                                | 3.12   |        | 3.15   | 3.19   | 3.16   |
|                                                                | 3.15   |        | 3.15   | 3.16   | 3.16   |
|                                                                | 3.16   |        | 3.16   | 3.15   | 3.15   |
|                                                                | 3.29   |        | 3.32   | 3.02   | 2.98   |
|                                                                | 3.01   |        | 2.98   | 3.28   | 3.32   |
|                                                                | 3.02   |        | 3.02   | 3.29   | 3.29   |
|                                                                | 3.29   |        | 3.29   | 3.02   | 3.02   |
| Mean value                                                     | 3.15   | 3.15   | 3.15   | 3.15   | 3.15   |
| Sn-I equatorial                                                | 3.20   |        | 3.19   | 3.24   | 3.00   |
|                                                                | 3.14   |        | 3.14   | 3.06   | 3.30   |
|                                                                | 3.19   |        | 3.20   | 3.00   | 3.24   |
|                                                                | 3.14   |        | 3.14   | 3.30   | 3.06   |
|                                                                | 3.27   |        | 3.27   | 3.17   | 3.17   |
|                                                                | 3.03   |        | 3.03   | 3.17   | 3.17   |
|                                                                | 3.02   |        | 3.02   | 3.17   | 3.17   |
|                                                                | 3.26   |        | 3.27   | 3.18   | 3.18   |
|                                                                | 3.28   |        | 3.27   | 3.17   | 3.16   |
|                                                                | 3.02   |        | 3.02   | 3.17   | 3.18   |
|                                                                | 3.02   |        | 3.02   | 3.17   | 3.17   |
|                                                                | 3.27   |        | 3.27   | 3.17   | 3.17   |
|                                                                | 3.17   |        | 3.17   | 3.27   | 3.03   |
|                                                                | 3.17   |        | 3.17   | 3.02   | 3.27   |
|                                                                | 3.17   |        | 3.18   | 3.03   | 3.27   |
|                                                                | 3.17   |        | 3.16   | 3.27   | 3.02   |
| Mean value                                                     | 3.16   | 3.16   | 3.16   | 3.16   | 3.16   |
| <b>Angles</b>                                                  |        |        |        |        |        |
| Sn-I apical                                                    | 159.93 |        | 160.02 | 159.89 | 160.01 |
|                                                                | 160.02 |        | 160.04 | 160.01 | 160.03 |
|                                                                | 160.63 |        | 160.73 | 160.67 | 160.64 |
|                                                                | 160.63 |        | 160.63 | 160.65 | 160.62 |
| Mean value                                                     | 160.30 | 160.35 | 160.31 | 160.33 | 160.33 |
| Sn-I equatorial                                                | 155.25 |        | 155.36 | 157.91 | 158.06 |
|                                                                | 155.00 |        | 154.94 | 158.28 | 158.27 |
|                                                                | 158.90 |        | 158.70 | 154.34 | 154.51 |
|                                                                | 158.35 |        | 158.90 | 154.14 | 154.07 |
|                                                                | 158.72 |        | 159.15 | 154.45 | 154.33 |
|                                                                | 159.22 |        | 158.50 | 154.64 | 154.81 |
|                                                                | 154.54 |        | 154.33 | 158.88 | 158.71 |
|                                                                | 154.69 |        | 154.81 | 158.35 | 158.51 |
| Mean value                                                     | 156.83 | 156.84 | 156.37 | 156.41 | 156.41 |
| <b>CsSnMgI3 - revPBE - Cell dimensions - FINE Optimization</b> |        |        |        |        |        |
| <b>Lattice constants</b>                                       |        |        |        |        |        |
|                                                                | Mg1    | Mg2    | Mg3    | Mg4    |        |
| a                                                              | 8.78   |        | 8.78   | 8.78   | 8.78   |
| b                                                              | 12.43  |        | 12.43  | 12.42  | 12.43  |
| c                                                              | 8.71   |        | 8.71   | 8.71   | 8.71   |
| $\alpha$                                                       | 90.01  |        | 89.99  | 90.02  | 90.01  |
| $\beta$                                                        | 90.04  |        | 89.97  | 90.01  | 89.97  |
| $\gamma$                                                       | 89.59  |        | 89.59  | 90.40  | 90.41  |
| Volume                                                         | 950.60 |        | 950.52 | 950.35 | 950.54 |

| Apical                           |                |             | Equatorial           |                |             |
|----------------------------------|----------------|-------------|----------------------|----------------|-------------|
| Bond                             | Times          | Length      | Equatorial           | Times          | Length      |
| Sn-I                             | 2              | 3.19        | Sn-I                 | 2              | 3.20        |
|                                  | 6              | 3.16        |                      | 2              | 3.19        |
|                                  | 6              | 3.15        |                      | 4              | 3.18        |
|                                  | 2              | 3.12        |                      | 18             | 3.17        |
| <b>Total/Average</b>             | <b>16</b>      | <b>3.15</b> |                      | 2              | 3.16        |
| Sn-I                             | 2              | 3.32        |                      | 4              | 3.14        |
|                                  | 5              | 3.29        | <b>Total/Average</b> | <b>32</b>      | <b>3.17</b> |
|                                  | 1              | 3.28        | Sn-I                 | 2              | 3.30        |
| <b>Total/Average</b>             | <b>8</b>       | <b>3.29</b> |                      | 1              | 3.28        |
| Mg-I                             | 5              | 3.02        |                      | 10             | 3.27        |
|                                  | 1              | 3.01        |                      | 1              | 3.26        |
|                                  | 2              | 2.98        |                      | 2              | 3.24        |
| <b>Total</b>                     | <b>8</b>       | <b>3.01</b> | <b>Total/Average</b> | <b>16</b>      | <b>3.27</b> |
|                                  |                |             | Mg-I                 | 2              | 3.06        |
| <b>Angle</b>                     | <b>Average</b> |             |                      | 4              | 3.03        |
| Sn-I-Sn                          | 159.99         |             |                      | 8              | 3.02        |
| Mg-I-Sn                          | 160.65         |             |                      | 2              | 3.00        |
|                                  |                |             | <b>Total/Average</b> | <b>16</b>      | <b>3.03</b> |
| <b>Lattice constants average</b> |                |             | <b>Angle</b>         | <b>Average</b> |             |
| a                                | 8.78           |             | Sn-I-Sn              | 154.64         |             |
| b                                | 12.43          |             | Mg-I-Sn              | 158.59         |             |
| c                                | 8.71           |             |                      |                |             |
| Volume                           | 950.50         |             |                      |                |             |
| $\alpha$                         | 90.01          |             |                      |                |             |
| $\beta$                          | 90.00          |             |                      |                |             |
| $\gamma$                         | 90.00          |             |                      |                |             |

| Structural data                                                |        |        |        |        |
|----------------------------------------------------------------|--------|--------|--------|--------|
| Ca-doped perovskite - Bonds - Optimized structure              |        |        |        |        |
|                                                                | Ca1    | Ca2    | Ca3    | Ca4    |
| <b>Bond length</b>                                             |        |        |        |        |
| Sn-I apical                                                    | 3.18   |        | 3.21   | 3.22   |
|                                                                | 3.22   |        | 3.19   | 3.18   |
|                                                                | 3.20   |        | 3.21   | 3.20   |
|                                                                | 3.20   |        | 3.20   | 3.21   |
|                                                                | 3.21   | 3.21   | 3.24   | 3.24   |
|                                                                | 3.25   | 3.25   | 3.21   | 3.21   |
|                                                                | 3.23   | 3.23   | 3.22   | 3.22   |
|                                                                | 3.22   | 3.22   | 3.23   | 3.23   |
| Mean value                                                     | 3.21   | 3.21   | 3.21   | 3.21   |
| Sn-I equatorial                                                | 3.22   |        | 3.19   | 3.23   |
|                                                                | 3.23   |        | 3.25   | 3.25   |
|                                                                | 3.19   |        | 3.22   | 3.28   |
|                                                                | 3.25   |        | 3.22   | 3.22   |
|                                                                | 3.24   | 3.24   | 3.22   | 3.22   |
|                                                                | 3.25   | 3.25   | 3.22   | 3.22   |
|                                                                | 3.25   | 3.25   | 3.21   | 3.22   |
|                                                                | 3.24   | 3.24   | 3.22   | 3.22   |
|                                                                | 3.23   | 3.24   | 3.21   | 3.22   |
|                                                                | 3.25   | 3.25   | 3.22   | 3.22   |
|                                                                | 3.25   | 3.19   | 3.22   | 3.22   |
|                                                                | 3.24   | 3.31   | 3.22   | 3.22   |
|                                                                | 3.22   | 3.22   | 3.24   | 3.25   |
|                                                                | 3.22   | 3.22   | 3.25   | 3.24   |
|                                                                | 3.22   | 3.22   | 3.25   | 3.24   |
|                                                                | 3.22   | 3.22   | 3.23   | 3.25   |
| Mean value                                                     | 3.23   | 3.23   | 3.23   | 3.23   |
| <b>Angles</b>                                                  |        |        |        |        |
| Sn-I apical                                                    | 158.80 |        | 158.75 | 158.08 |
|                                                                | 158.37 |        | 158.38 | 158.30 |
|                                                                | 153.98 | 153.96 | 154.57 | 154.54 |
|                                                                | 154.29 | 154.29 | 154.32 | 154.29 |
| Mean value                                                     | 156.36 | 156.34 | 156.32 | 156.29 |
| Sn-I equatorial                                                | 154.02 |        | 155.16 | 151.58 |
|                                                                | 155.38 |        | 154.17 | 150.62 |
|                                                                | 150.88 | 150.74 | 154.75 | 155.18 |
|                                                                | 150.59 | 150.22 | 155.37 | 154.97 |
|                                                                | 150.92 | 150.77 | 154.97 | 154.99 |
|                                                                | 151.22 | 150.70 | 154.49 | 155.18 |
|                                                                | 155.02 | 155.00 | 150.88 | 150.74 |
|                                                                | 154.49 | 155.19 | 151.17 | 150.77 |
| Mean value                                                     | 152.82 | 152.74 | 152.98 | 153.01 |
| <b>CsSnCa13 - revPBE - Cell dimensions - FINE Optimization</b> |        |        |        |        |
|                                                                | Ca1    | Ca2    | Ca3    | Ca4    |
| <b>Lattice constants</b>                                       |        |        |        |        |
| a                                                              | 9.02   |        | 9.02   | 9.02   |
| b                                                              | 12.58  |        | 12.58  | 12.58  |
| c                                                              | 8.74   |        | 8.74   | 8.74   |
| $\alpha$                                                       | 89.82  |        | 90.18  | 90.18  |
| $\beta$                                                        | 89.99  |        | 90.01  | 89.96  |
| $\gamma$                                                       | 90.20  |        | 90.20  | 89.82  |
| Volume                                                         | 992.25 |        | 992.26 | 992.23 |

| Apical                           |           | Equatorial           |           |
|----------------------------------|-----------|----------------------|-----------|
| Bond                             | Length    | Equatorial           | Length    |
| Sn-I                             | 2         | Sn-I                 | 2         |
|                                  | 4         |                      | 1         |
|                                  | 6         |                      | 25        |
|                                  | 2         |                      | 2         |
|                                  | 2         |                      | 2         |
| <b>Total/Average</b>             | <b>16</b> | <b>Total/Average</b> | <b>32</b> |
| Sn-I                             | 4         | Sn-I                 | 1         |
|                                  | 4         |                      | 9         |
| <b>Total/Average</b>             | <b>8</b>  | <b>Total/Average</b> | <b>16</b> |
| Ca-I                             | 2         | Ca-I                 | 2         |
|                                  | 2         |                      | 13        |
|                                  | 4         |                      | 1         |
| <b>Total</b>                     | <b>8</b>  | <b>Total/Average</b> | <b>16</b> |
| Angle                            | Average   | Angle                | Average   |
| Sn-I-Sn                          | 158.38    | Sn-I-Sn              | 154.89    |
| Ca-I-Sn                          | 154.28    | Ca-I-Sn              | 150.88    |
| <b>Lattice constants average</b> |           |                      |           |
| a                                | 9.02      |                      |           |
| b                                | 12.58     |                      |           |
| c                                | 8.74      |                      |           |
| Volume                           | 992.25    |                      |           |
| $\alpha$                         | 90.00     |                      |           |
| $\beta$                          | 89.99     |                      |           |
| $\gamma$                         | 90.01     |                      |           |

| Mg-doped perovskite |                     |                     |                     |                     |         |
|---------------------|---------------------|---------------------|---------------------|---------------------|---------|
| Atom                | 1 - Voronoi charges | 2 - Voronoi charges | 3 - Voronoi charges | 4 - Voronoi charges | Average |
| Sn - HP             | 0.305               | 0.304               | 0.305               | 0.303               | 0.304   |
| Sn - VP             | 0.281               | 0.279               | 0.281               | 0.278               | 0.280   |
| Sn - DP             | 0.248               | 0.250               | 0.247               | 0.249               | 0.249   |
| Mg                  | 0.334               | 0.335               | 0.333               | 0.335               | 0.334   |
| I - eq - HP         | -0.164              | -0.164              | -0.165              | -0.165              | -0.163  |
| I - eq - HP         | -0.164              | -0.164              | -0.165              | -0.165              |         |
| I - eq - HP         | -0.163              | -0.163              | -0.163              | -0.163              |         |
| I - eq - HP         | -0.162              | -0.162              | -0.162              | -0.161              |         |
| I - eq - DHP        | -0.133              | -0.133              | -0.132              | -0.133              | -0.132  |
| I - eq - DHP        | -0.132              | -0.133              | -0.132              | -0.132              |         |
| I - eq - DHP        | -0.132              | -0.132              | -0.131              | -0.132              |         |
| I - eq - DHP        | -0.131              | -0.131              | -0.131              | -0.131              |         |
| I - ap - VP         | -0.175              | -0.176              | -0.175              | -0.176              | -0.175  |
| I - ap - VP         | -0.175              | -0.173              | -0.175              | -0.174              |         |
| I - ap - DVP        | -0.123              | -0.123              | -0.123              | -0.123              | -0.123  |
| I - ap - DVP        | -0.123              | -0.123              | -0.123              | -0.123              |         |
| Cs                  | 0.152               | 0.152               | 0.153               | 0.153               | 0.153   |
| <b>Suma</b>         | -0.001              | -0.001              | 0.001               | -0.001              | -0.001  |

| CsSnI - orthorhombic |                          |
|----------------------|--------------------------|
| Atom                 | Averaged Voronoi charges |
| Sn                   | 0.261                    |
| I - equatoria        | -0.141                   |
| I - apical           | -0.141                   |
| Cs                   | 0.162                    |
| <b>Suma</b>          | 0.000                    |

| Ca-doped perovskite |                 |                     |                     |                     |         |
|---------------------|-----------------|---------------------|---------------------|---------------------|---------|
| Atom                | Voronoi charges | 2 - Voronoi charges | 3 - Voronoi charges | 4 - Voronoi charges | Average |
| Sn - HP             | 0.305           | 0.306               | 0.307               | 0.309               | 0.307   |
| Sn - VP             | 0.290           | 0.290               | 0.289               | 0.289               | 0.290   |
| Sn - DP             | 0.270           | 0.269               | 0.272               | 0.271               | 0.271   |
| Ca                  | 0.394           | 0.393               | 0.392               | 0.392               | 0.393   |
| I - eq - HP         | -0.174          | -0.173              | -0.176              | -0.176              | -0.173  |
| I - eq - HP         | -0.173          | -0.173              | -0.173              | -0.172              |         |
| I - eq - HP         | -0.172          | -0.171              | -0.172              | -0.171              |         |
| I - eq - HP         | -0.172          | -0.171              | -0.172              | -0.170              |         |
| I - eq - DHP        | -0.139          | -0.140              | -0.139              | -0.140              | -0.139  |
| I - eq - DHP        | -0.139          | -0.139              | -0.139              | -0.139              |         |
| I - eq - DHP        | -0.138          | -0.139              | -0.137              | -0.139              |         |
| I - eq - DHP        | -0.137          | -0.138              | -0.137              | -0.138              |         |
| I - ap - VP         | -0.170          | -0.172              | -0.173              | -0.173              | -0.171  |
| I - ap - VP         | -0.171          | -0.170              | -0.170              | -0.170              |         |
| I - ap - DVP        | -0.141          | -0.141              | -0.140              | -0.140              | -0.140  |
| I - ap - DVP        | -0.141          | -0.141              | -0.140              | -0.139              |         |
| Cs                  | 0.153           | 0.153               | 0.152               | 0.152               | 0.152   |
| <b>Suma</b>         | 0.002           | 0.000               | 0.000               | 0.002               | 0.001   |

**CsSnI3**

|     | a               | b                | c               | Volume          | Energy (eV)        | Birch-Murnaghan | Residual  | Residual^2 |
|-----|-----------------|------------------|-----------------|-----------------|--------------------|-----------------|-----------|------------|
| 11  | 9.427612        | 13.254135        | 9.286972        | 1160.4521       | -14884.2381        | -14884.2298     | -0.008328 | 0.00007    |
| 10  | 9.380709        | 13.188194        | 9.240768        | 1143.2180       | -14884.4704        | -14884.4682     | -0.002241 | 0.00001    |
| 9   | 9.334039        | 13.122581        | 9.194794        | 1126.2398       | -14884.6849        | -14884.6872     | 0.002293  | 0.00001    |
| 8   | 9.287601        | 13.057294        | 9.149049        | 1109.5137       | -14884.8804        | -14884.8862     | 0.005856  | 0.00003    |
| 7   | 9.241394        | 12.992333        | 9.103532        | 1093.0362       | -14885.0565        | -14885.0645     | 0.008023  | 0.00006    |
| 6   | 9.195417        | 12.927694        | 9.058240        | 1076.8031       | -14885.2121        | -14885.2214     | 0.009269  | 0.00009    |
| 5   | 9.149668        | 12.863377        | 9.013174        | 1060.8112       | -14885.3468        | -14885.3562     | 0.009459  | 0.00009    |
| 4   | 9.104147        | 12.799380        | 8.968333        | 1045.0569       | -14885.4592        | -14885.4683     | 0.009010  | 0.00008    |
| 3   | 9.058853        | 12.735702        | 8.923714        | 1029.5365       | -14885.5489        | -14885.5567     | 0.007864  | 0.00006    |
| 2   | 9.013784        | 12.672340        | 8.879318        | 1014.2466       | -14885.6141        | -14885.6209     | 0.006821  | 0.00005    |
| 1   | 8.968940        | 12.609294        | 8.835142        | 999.1839        | -14885.6554        | -14885.6600     | 0.004537  | 0.00002    |
| 0   | <b>8.924318</b> | <b>12.546561</b> | <b>8.791186</b> | <b>984.3447</b> | <b>-14885.6732</b> | -14885.6732     | 0.000000  | 0.00000    |
| -1  | 8.879696        | 12.483828        | 8.747230        | 969.6532        | -14885.6604        | -14885.6596     | -0.000870 | 0.00000    |
| -2  | 8.835298        | 12.421409        | 8.703494        | 955.1811        | -14885.6212        | -14885.6181     | -0.003118 | 0.00001    |
| -3  | 8.791121        | 12.359302        | 8.659976        | 940.9247        | -14885.5539        | -14885.5480     | -0.005862 | 0.00003    |
| -4  | 8.747166        | 12.297505        | 8.616677        | 926.8814        | -14885.4553        | -14885.4484     | -0.006936 | 0.00005    |
| -5  | 8.703430        | 12.236018        | 8.573593        | 913.0476        | -14885.3252        | -14885.3182     | -0.006971 | 0.00005    |
| -6  | 8.659913        | 12.174838        | 8.530725        | 899.4203        | -14885.1643        | -14885.1567     | -0.007602 | 0.00006    |
| -7  | 8.616613        | 12.113964        | 8.488072        | 885.9963        | -14884.9680        | -14884.9628     | -0.005273 | 0.00003    |
| -8  | 8.573530        | 12.053394        | 8.445631        | 872.7726        | -14884.7383        | -14884.7355     | -0.002752 | 0.00001    |
| -9  | 8.530663        | 11.993127        | 8.403403        | 859.7465        | -14884.4732        | -14884.4739     | 0.000668  | 0.00000    |
| -10 | 8.488009        | 11.933161        | 8.361386        | 846.9146        | -14884.1722        | -14884.1769     | 0.004683  | 0.00002    |

**B\_{0}**      **B'\_{0}**      **B0 (GPa)**  
 0.1211      4.0649      **19.402746**

**SSR**  
 8.21E-04

Birch – Murnaghan EOS

$$E(V) = E_0 + \frac{9V_0B_0}{16} \left\{ \left[ \left( \frac{V_0}{V} \right)^{\frac{2}{3}} - 1 \right]^3 B'_0 + \left[ \left( \frac{V_0}{V} \right)^{\frac{2}{3}} - 1 \right]^2 \left[ 6 - 4 \left( \frac{V_0}{V} \right)^{\frac{2}{3}} \right] \right\}$$

**Mg-doped perovskite**

|           | <b>a</b>               | <b>b</b>                | <b>c</b>         | <b>Volume</b>   | <b>Energy (eV)</b> | <b>Birch-Murnaghan</b> | <b>Residual</b> | <b>Residual<sup>2</sup></b> |
|-----------|------------------------|-------------------------|------------------|-----------------|--------------------|------------------------|-----------------|-----------------------------|
| <b>11</b> | 9.278046               | 13.127258               | 9.201496         | 1120.6707       | -14866.8875        | -14866.8825            | -0.00501        | 0.00003                     |
| <b>10</b> | 9.231886               | 13.061949               | 9.155718         | 1104.0275       | -14867.1172        | -14867.1150            | -0.00217        | 0.00000                     |
| <b>9</b>  | 9.185956               | 12.996964               | 9.110167         | 1087.6312       | -14867.3293        | -14867.3291            | -0.00019        | 0.00000                     |
| <b>8</b>  | 9.140255               | 12.932302               | 9.064842         | 1071.4784       | -14867.5216        | -14867.5239            | 0.00225         | 0.00001                     |
| <b>7</b>  | 9.094781               | 12.867963               | 9.019744         | 1055.5658       | -14867.6946        | -14867.6987            | 0.00410         | 0.00002                     |
| <b>6</b>  | 9.049534               | 12.803943               | 8.974869         | 1039.8893       | -14867.8474        | -14867.8528            | 0.00545         | 0.00003                     |
| <b>5</b>  | 9.004511               | 12.740242               | 8.930218         | 1024.4456       | -14867.9786        | -14867.9855            | 0.00688         | 0.00005                     |
| <b>4</b>  | 8.959713               | 12.676857               | 8.885789         | 1009.2314       | -14868.0884        | -14868.0959            | 0.00753         | 0.00006                     |
| <b>3</b>  | 8.915137               | 12.613788               | 8.841581         | 994.2430        | -14868.1754        | -14868.1833            | 0.00782         | 0.00006                     |
| <b>2</b>  | 8.870783               | 12.551033               | 8.797593         | 979.4772        | -14868.2388        | -14868.2467            | 0.00796         | 0.00006                     |
| <b>1</b>  | 8.826650               | 12.488590               | 8.753824         | 964.9308        | -14868.2781        | -14868.2855            | 0.00741         | 0.00005                     |
| <b>0</b>  | <b>8.782736</b>        | <b>12.426458</b>        | <b>8.710273</b>  | <b>950.6005</b> | <b>-14868.2986</b> | -14868.2986            | 0.00000         | 0.00000                     |
| <b>1</b>  | 8.738822               | 12.364326               | 8.666722         | 936.4126        | -14868.2801        | -14868.2850            | 0.00489         | 0.00002                     |
| <b>2</b>  | 8.695128               | 12.302504               | 8.623388         | 922.4365        | -14868.2393        | -14868.2437            | 0.00445         | 0.00002                     |
| <b>3</b>  | 8.651653               | 12.240992               | 8.580271         | 908.6691        | -14868.1707        | -14868.1737            | 0.00302         | 0.00001                     |
| <b>4</b>  | 8.608394               | 12.179787               | 8.537370         | 895.1071        | -14868.0720        | -14868.0740            | 0.00200         | 0.00000                     |
| <b>5</b>  | 8.565352               | 12.118888               | 8.494683         | 881.7475        | -14867.9416        | -14867.9436            | 0.00200         | 0.00000                     |
| <b>6</b>  | 8.522526               | 12.058293               | 8.452209         | 868.5872        | -14867.7796        | -14867.7814            | 0.00183         | 0.00000                     |
| <b>7</b>  | 8.479913               | 11.998002               | 8.409948         | 855.6235        | -14867.5852        | -14867.5863            | 0.00113         | 0.00000                     |
| <b>8</b>  | 8.437513               | 11.938012               | 8.367899         | 842.8532        | -14867.3572        | -14867.3572            | 0.00001         | 0.00000                     |
| <b>9</b>  | 8.395326               | 11.878322               | 8.326059         | 830.2735        | -14867.0942        | -14867.0929            | -0.00121        | 0.00000                     |
| <b>10</b> | 8.353349               | 11.818930               | 8.284429         | 817.8816        | -14866.7950        | -14866.7924            | -0.00267        | 0.00001                     |
|           | <b>B<sub>{0}</sub></b> | <b>B'<sub>{0}</sub></b> | <b>B0 (GPa)</b>  |                 |                    |                        |                 | <b>SSR</b>                  |
|           | 0.1246                 | 4.3104                  | <b>19.966983</b> |                 |                    |                        |                 | 4.39E-04                    |

### Ca-doped perovskite

|    | a               | b                | c                | Volume          | Energy (eV)        | irch-Murnagha | Residual | Residual^2 |
|----|-----------------|------------------|------------------|-----------------|--------------------|---------------|----------|------------|
| 11 | 9.532628        | 13.289869        | 9.233616         | 1169.7692       | -14902.2387        | -14902.2349   | -0.00372 | 0.00001    |
| 10 | 9.485202        | 13.223751        | 9.187677         | 1152.3966       | -14902.4670        | -14902.4656   | -0.00141 | 0.00000    |
| 9  | 9.438012        | 13.157961        | 9.141968         | 1135.2822       | -14902.6773        | -14902.6778   | 0.00048  | 0.00000    |
| 8  | 9.391056        | 13.092498        | 9.096485         | 1118.4217       | -14902.8684        | -14902.8708   | 0.00237  | 0.00001    |
| 7  | 9.344335        | 13.027362        | 9.051229         | 1101.8119       | -14903.0409        | -14903.0440   | 0.00302  | 0.00001    |
| 6  | 9.297845        | 12.962549        | 9.006198         | 1085.4485       | -14903.1925        | -14903.1966   | 0.00404  | 0.00002    |
| 5  | 9.251587        | 12.898059        | 8.961391         | 1069.3282       | -14903.3233        | -14903.3279   | 0.00460  | 0.00002    |
| 4  | 9.205560        | 12.833889        | 8.916807         | 1053.4474       | -14903.4325        | -14903.4371   | 0.00462  | 0.00002    |
| 3  | 9.159761        | 12.770039        | 8.872445         | 1037.8025       | -14903.5189        | -14903.5235   | 0.00465  | 0.00002    |
| 2  | 9.114190        | 12.706506        | 8.828303         | 1022.3897       | -14903.5821        | -14903.5863   | 0.00413  | 0.00002    |
| 1  | 9.068846        | 12.643290        | 8.784381         | 1007.2060       | -14903.6210        | -14903.6245   | 0.00356  | 0.00001    |
| 0  | <b>9.023727</b> | <b>12.580388</b> | <b>8.740678</b>  | <b>992.2477</b> | <b>-14903.6375</b> | -14903.6375   | 0.00000  | 0.00000    |
| 1  | 8.978608        | 12.517486        | 8.696975         | 977.4383        | -14903.6215        | -14903.6241   | 0.00262  | 0.00001    |
| 2  | 8.933715        | 12.454899        | 8.653490         | 962.8500        | -14903.5827        | -14903.5834   | 0.00070  | 0.00000    |
| 3  | 8.889047        | 12.392624        | 8.610222         | 948.4793        | -14903.5139        | -14903.5143   | 0.00041  | 0.00000    |
| 4  | 8.844602        | 12.330661        | 8.567171         | 934.3231        | -14903.4158        | -14903.4160   | 0.00023  | 0.00000    |
| 5  | 8.800379        | 12.269008        | 8.524335         | 920.3783        | -14903.2875        | -14903.2874   | -0.00011 | 0.00000    |
| 6  | 8.756377        | 12.207663        | 8.481714         | 906.6416        | -14903.1285        | -14903.1276   | -0.00087 | 0.00000    |
| 7  | 8.712595        | 12.146624        | 8.439305         | 893.1097        | -14902.9359        | -14902.9355   | -0.00046 | 0.00000    |
| 8  | 8.669032        | 12.085891        | 8.397109         | 879.7800        | -14902.7110        | -14902.7099   | -0.00111 | 0.00000    |
| 9  | 8.625687        | 12.025462        | 8.355123         | 866.6492        | -14902.4504        | -14902.4499   | -0.00046 | 0.00000    |
| 10 | 8.582558        | 11.965334        | 8.313347         | 853.7142        | -14902.1542        | -14902.1543   | 0.00007  | 0.00000    |
|    | <b>B_{0}</b>    | <b>B'_{0}</b>    | <b>B0 (GPa)</b>  |                 |                    |               |          | <b>SSR</b> |
|    | 0.1179          | 4.2554           | <b>18.891085</b> |                 |                    |               |          | 1.51E-04   |





| Sr-doped perovskite |           |           |           |            |             |                   |           |           |           |       |
|---------------------|-----------|-----------|-----------|------------|-------------|-------------------|-----------|-----------|-----------|-------|
|                     | 1.868     | n=2       |           |            |             | n=2               |           |           |           |       |
| n_ext               | qVoc      | qVoc_theo | residual  | residual^2 | qV_mp (n_2) | J_MP / J_SC (n_2) | V_oc'     | ff_1      | ff_2      | FF    |
| 1.00E-03            | 1.399E+00 | 1.399E+00 | 0.000E+00 | 0.000E+00  | 1.23E+00    | 9.598E+01         | 2.723E+01 | 8.820E-01 | 9.598E-01 | 0.847 |
| 2.00E-03            | 1.417E+00 | 1.417E+00 | 0.000E+00 | 0.000E+00  | 1.25E+00    | 9.604E+01         | 2.758E+01 | 8.830E-01 | 9.604E-01 | 0.848 |
| 3.00E-03            | 1.427E+00 | 1.427E+00 | 0.000E+00 | 0.000E+00  | 1.26E+00    | 9.607E+01         | 2.778E+01 | 8.835E-01 | 9.607E-01 | 0.849 |
| 4.00E-03            | 1.435E+00 | 1.435E+00 | 0.000E+00 | 0.000E+00  | 1.27E+00    | 9.609E+01         | 2.792E+01 | 8.839E-01 | 9.609E-01 | 0.849 |
| 5.00E-03            | 1.441E+00 | 1.441E+00 | 0.000E+00 | 0.000E+00  | 1.27E+00    | 9.610E+01         | 2.804E+01 | 8.842E-01 | 9.610E-01 | 0.850 |
| 6.00E-03            | 1.445E+00 | 1.445E+00 | 0.000E+00 | 0.000E+00  | 1.28E+00    | 9.612E+01         | 2.813E+01 | 8.845E-01 | 9.612E-01 | 0.850 |
| 7.00E-03            | 1.449E+00 | 1.449E+00 | 0.000E+00 | 0.000E+00  | 1.28E+00    | 9.613E+01         | 2.820E+01 | 8.847E-01 | 9.613E-01 | 0.850 |
| 8.00E-03            | 1.453E+00 | 1.453E+00 | 0.000E+00 | 0.000E+00  | 1.29E+00    | 9.614E+01         | 2.827E+01 | 8.849E-01 | 9.614E-01 | 0.851 |
| 9.00E-03            | 1.456E+00 | 1.456E+00 | 0.000E+00 | 0.000E+00  | 1.29E+00    | 9.615E+01         | 2.833E+01 | 8.851E-01 | 9.615E-01 | 0.851 |
| 1.00E-02            | 1.458E+00 | 1.458E+00 | 0.000E+00 | 0.000E+00  | 1.29E+00    | 9.615E+01         | 2.838E+01 | 8.852E-01 | 9.615E-01 | 0.851 |

| Ba-doped perovskite |           |           |           |            |             |                   |           |           |           |       |
|---------------------|-----------|-----------|-----------|------------|-------------|-------------------|-----------|-----------|-----------|-------|
|                     | 2.118     | n=2       |           |            |             | n=2               |           |           |           |       |
| n_ext               | qVoc      | qVoc_theo | residual  | residual^2 | qV_mp (n_2) | J_MP / J_SC (n_2) | V_oc'     | ff_1      | ff_2      | FF    |
| 1.00E-03            | 1.635E+00 | 1.635E+00 | 0.000E+00 | 0.000E+00  | 1.46E+00    | 9.659E+01         | 3.181E+01 | 8.938E-01 | 9.659E-01 | 0.863 |
| 2.00E-03            | 1.652E+00 | 1.652E+00 | 0.000E+00 | 0.000E+00  | 1.48E+00    | 9.663E+01         | 3.216E+01 | 8.946E-01 | 9.663E-01 | 0.864 |
| 3.00E-03            | 1.663E+00 | 1.663E+00 | 0.000E+00 | 0.000E+00  | 1.49E+00    | 9.665E+01         | 3.236E+01 | 8.950E-01 | 9.665E-01 | 0.865 |
| 4.00E-03            | 1.670E+00 | 1.670E+00 | 0.000E+00 | 0.000E+00  | 1.50E+00    | 9.667E+01         | 3.250E+01 | 8.954E-01 | 9.667E-01 | 0.866 |
| 5.00E-03            | 1.676E+00 | 1.676E+00 | 0.000E+00 | 0.000E+00  | 1.50E+00    | 9.668E+01         | 3.261E+01 | 8.956E-01 | 9.668E-01 | 0.866 |
| 6.00E-03            | 1.681E+00 | 1.681E+00 | 0.000E+00 | 0.000E+00  | 1.51E+00    | 9.669E+01         | 3.271E+01 | 8.958E-01 | 9.669E-01 | 0.866 |
| 7.00E-03            | 1.685E+00 | 1.685E+00 | 0.000E+00 | 0.000E+00  | 1.51E+00    | 9.670E+01         | 3.278E+01 | 8.960E-01 | 9.670E-01 | 0.866 |
| 8.00E-03            | 1.688E+00 | 1.688E+00 | 0.000E+00 | 0.000E+00  | 1.51E+00    | 9.670E+01         | 3.285E+01 | 8.961E-01 | 9.670E-01 | 0.867 |
| 9.00E-03            | 1.691E+00 | 1.691E+00 | 0.000E+00 | 0.000E+00  | 1.52E+00    | 9.671E+01         | 3.291E+01 | 8.963E-01 | 9.671E-01 | 0.867 |
| 1.00E-02            | 1.694E+00 | 1.694E+00 | 0.000E+00 | 0.000E+00  | 1.52E+00    | 9.671E+01         | 3.296E+01 | 8.964E-01 | 9.671E-01 | 0.867 |

| CsSnI3   |           |           |           |            |             |                   |           |           |           |       |
|----------|-----------|-----------|-----------|------------|-------------|-------------------|-----------|-----------|-----------|-------|
|          | 1.3       | n=2       |           |            |             | n=2               |           |           |           |       |
| n_ext    | qVoc      | qVoc_theo | residual  | residual^2 | qV_mp (n_2) | J_MP / J_SC (n_2) | V_oc'     | ff_1      | ff_2      | FF    |
| 1.00E-03 | 8.648E-01 | 8.648E-01 | 0.000E+00 | 0.000E+00  | 7.25E-01    | 9.331E+01         | 1.683E+01 | 8.393E-01 | 9.331E-01 | 0.783 |
| 2.00E-03 | 8.826E-01 | 8.826E-01 | 0.000E+00 | 0.000E+00  | 7.42E-01    | 9.345E+01         | 1.718E+01 | 8.413E-01 | 9.345E-01 | 0.786 |
| 3.00E-03 | 8.930E-01 | 8.930E-01 | 0.000E+00 | 0.000E+00  | 7.52E-01    | 9.353E+01         | 1.738E+01 | 8.424E-01 | 9.353E-01 | 0.788 |
| 4.00E-03 | 9.004E-01 | 9.004E-01 | 0.000E+00 | 0.000E+00  | 7.59E-01    | 9.359E+01         | 1.752E+01 | 8.432E-01 | 9.359E-01 | 0.789 |
| 5.00E-03 | 9.061E-01 | 9.061E-01 | 0.000E+00 | 0.000E+00  | 7.64E-01    | 9.363E+01         | 1.763E+01 | 8.438E-01 | 9.363E-01 | 0.790 |
| 6.00E-03 | 9.108E-01 | 9.108E-01 | 0.000E+00 | 0.000E+00  | 7.68E-01    | 9.367E+01         | 1.773E+01 | 8.443E-01 | 9.367E-01 | 0.791 |
| 7.00E-03 | 9.148E-01 | 9.148E-01 | 0.000E+00 | 0.000E+00  | 7.72E-01    | 9.370E+01         | 1.780E+01 | 8.447E-01 | 9.370E-01 | 0.791 |
| 8.00E-03 | 9.182E-01 | 9.182E-01 | 0.000E+00 | 0.000E+00  | 7.75E-01    | 9.372E+01         | 1.787E+01 | 8.451E-01 | 9.372E-01 | 0.792 |
| 9.00E-03 | 9.212E-01 | 9.212E-01 | 0.000E+00 | 0.000E+00  | 7.78E-01    | 9.375E+01         | 1.793E+01 | 8.454E-01 | 9.375E-01 | 0.793 |
| 1.00E-02 | 9.239E-01 | 9.239E-01 | 0.000E+00 | 0.000E+00  | 7.81E-01    | 9.376E+01         | 1.798E+01 | 8.457E-01 | 9.376E-01 | 0.793 |

|          | J_MP (mA) | J_SC (mA) | V_oc | V_MP | FF   | FF -Calculated |
|----------|-----------|-----------|------|------|------|----------------|
| Champion | 18.81     | 20.32     | 0.84 | 0.71 | 0.78 | 0.78           |

| E <sub>g</sub> | h (eV*s)   | c (m/s)    | h <sup>3</sup> | c <sup>2</sup> | h <sup>3</sup> *c <sup>2</sup> | 2pi/h <sup>3</sup> *c <sup>2</sup> | Integral   | 1/m <sup>2</sup> *s |
|----------------|------------|------------|----------------|----------------|--------------------------------|------------------------------------|------------|---------------------|
| 1.30           | 4.1357E-15 | 2.9979E+08 | 7.0735E-44     | 8.9876E+16     | 6.3574E-27                     | 9.8833E+26                         | 4.7897E-24 | 4.7338E+03          |
| 1.32           | 4.1357E-15 | 2.9979E+08 | 7.0735E-44     | 8.9876E+16     | 6.3574E-27                     | 9.8833E+26                         | 2.2659E-24 | 2.2395E+03          |
| 1.55           | 4.1357E-15 | 2.9979E+08 | 7.0735E-44     | 8.9876E+16     | 6.3574E-27                     | 9.8833E+26                         | 4.0220E-28 | 3.9751E-01          |
| 1.87           | 4.1357E-15 | 2.9979E+08 | 7.0735E-44     | 8.9876E+16     | 6.3574E-27                     | 9.8833E+26                         | 2.2693E-33 | 2.2428E-06          |
| 2.12           | 4.1357E-15 | 2.9979E+08 | 7.0735E-44     | 8.9876E+16     | 6.3574E-27                     | 9.8833E+26                         | 1.7282E-37 | 1.7080E-10          |

| E <sub>g</sub> | Q <sub>c</sub>       | Q <sub>s</sub>       | J <sub>sc</sub>    | q*Q <sub>c</sub>   | V <sub>oc</sub> | V <sub>max</sub> | qV/kT        | EXP(qV/kT)   | J <sub>rr</sub>    | J <sub>max</sub>   | P <sub>max</sub>   | FF           | n            |
|----------------|----------------------|----------------------|--------------------|--------------------|-----------------|------------------|--------------|--------------|--------------------|--------------------|--------------------|--------------|--------------|
|                | 1/cm <sup>2</sup> *s | 1/cm <sup>2</sup> *s | mA/cm <sup>2</sup> | mA/cm <sup>2</sup> | V               | V                | adimensional | adimensional | mA/cm <sup>2</sup> | mA/cm <sup>2</sup> | mA/cm <sup>2</sup> | adimensional | %            |
| 1.30           | <b>4.734E-01</b>     | <b>2.236E+17</b>     | <b>35.83</b>       | 7.58E-17           | <b>1.07</b>     | <b>0.95</b>      | 3.71E+01     | 1.24E+16     | 0.94               | <b>34.88</b>       | <b>33.21</b>       | <b>0.865</b> | <b>33.20</b> |
| 1.32           | 2.239E-01            | 2.211E+17            | 35.43              | 3.59E-17           | 1.09            | 0.97             | 3.78E+01     | 2.55E+16     | 0.91               | 34.52              | 33.50              | 0.867        | 33.49        |
| 1.55           | <b>3.975E-05</b>     | <b>1.702E+17</b>     | <b>27.27</b>       | 6.37E-21           | <b>1.31</b>     | <b>1.18</b>      | 4.60E+01     | 9.12E+19     | 0.58               | <b>26.69</b>       | <b>31.52</b>       | <b>0.885</b> | <b>31.50</b> |
| 1.87           | 2.243E-10            | 1.106E+17            | 17.72              | 3.59E-26           | 1.60            | 1.47             | 5.74E+01     | 8.44E+24     | 0.30               | 17.42              | 25.68              | 0.903        | 25.67        |
| 2.12           | 1.708E-14            | 7.558E+16            | 12.11              | 2.74E-30           | 1.84            | 1.70             | 6.64E+01     | 6.57E+28     | 0.18               | 11.93              | 20.34              | 0.913        | 20.33        |

|    | $x$ | $C_{\{6\}}$ | $C_{\{6\}}$ - Exponential residual | residual | residual <sup>2</sup> |
|----|-----|-------------|------------------------------------|----------|-----------------------|
| H  | 1   | 1.451       | 6.15                               | -4.7003  | 22.0930               |
| Li | 2   | 16.6865     | 15.95                              | 0.7332   | 0.5376                |
| Na | 3   | 59.18       | 48.48                              | 10.7047  | 114.5916              |
| K  | 4   | 111.9341    | 121.05                             | -9.1200  | 83.1747               |
| Rb | 5   | 255.6865    | 253.30                             | 2.3824   | 5.6757                |
| Cs | 6   |             | <b>466.12</b>                      |          |                       |

**SSR**  
226.072751

|            |            |            |             |            |
|------------|------------|------------|-------------|------------|
| <b>A</b>   | <b>k</b>   | <b>n</b>   | <b>B</b>    | <b>D</b>   |
| 19602.3636 | 0.00431062 | 3.42680136 | 1.011967368 | 1.00026253 |

|    |               |                 |
|----|---------------|-----------------|
| Ba | <b>466.12</b> | Exponential fit |
| Ba | <b>476.20</b> | Promedio        |
| Ba | <b>486.28</b> | Polynomial fit  |

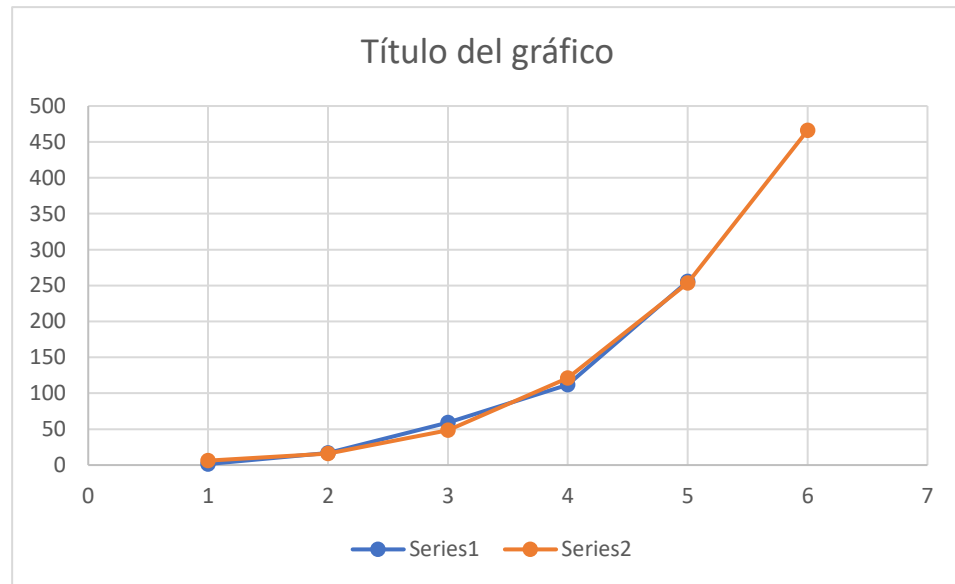

|    | $x$ | $C_{\{6\}}$ | $C_{\{6\}} - \text{PolyFourth}$ | residual   | $\text{residual}^2$      |
|----|-----|-------------|---------------------------------|------------|--------------------------|
| H  | 1   | 1.451       | 5.32                            | -3.8723415 | 14.995028                |
| Li | 2   | 16.6865     | 18.19                           | -1.5022748 | 2.2568296                |
| Na | 3   | 59.18       | 49.97                           | 9.21006834 | 84.8253588               |
| K  | 4   | 111.9341    | 119.62                          | -7.6887648 | 59.1171034               |
| Rb | 5   | 255.6865    | 253.69                          | 2.00045209 | 4.00180857               |
| Cs | 6   |             | <b>486.28</b>                   |            | <b>SSR</b><br>165.196129 |

| A | B         | C          | D | E          |
|---|-----------|------------|---|------------|
| 0 | 3.4479008 | 1.55950645 | 0 | 0.31593421 |

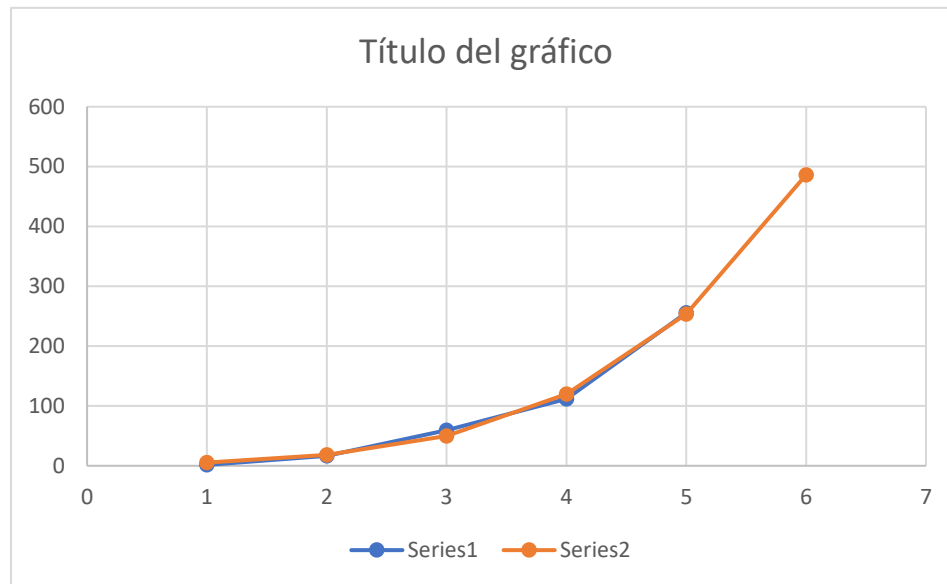

|    | $x$ | $R_{\{0\}}$ | $R_{\{0\}} - \text{Lineal residual}$ | $\text{residual}^2$ |            |
|----|-----|-------------|--------------------------------------|---------------------|------------|
| H  | 1   | 1.001       |                                      |                     |            |
| Li | 2   | 0.825       | 0.935                                | -0.1100             | 0.0121     |
| Na | 3   | 1.144       | 1.177                                | -0.0330             | 0.0011     |
| K  | 4   | 1.485       | 1.419                                | 0.0660              | 0.0044     |
| Rb | 5   | 1.628       | 1.661                                | -0.0330             | 0.0011     |
| Cs | 6   |             | <b>1.903</b>                         |                     | <b>SSR</b> |
|    |     |             |                                      |                     | 0.006534   |

**A**                      **B**  
0.45099998    0.24199997

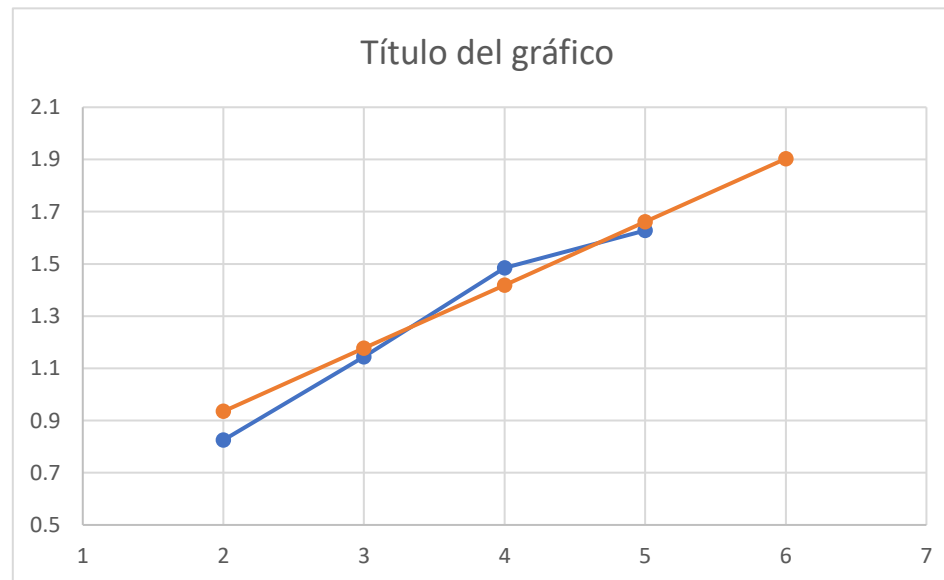























|             | $l$  | $\Phi$ | $\theta_a$ | $\theta_b$ | $\theta_c$ |
|-------------|------|--------|------------|------------|------------|
| CsSnI3 Exp  | 3.12 | 90.00  | 55.19      | 7.02       | 55.52      |
| CsSnI3 Theo | 3.20 | 90.00  | 54.33      | 10.64      | 55.17      |
| CsSnMgI3    | 3.16 | 90.00  | 54.26      | 9.85       | 54.73      |
| Mg          | 3.02 | 90.00  | 53.33      | 10.10      | 53.75      |
| Sn          | 3.20 | 90.00  | 54.52      | 9.75       | 55.00      |
| CsSnCaI3    | 3.23 | 90.00  | 55.03      | 11.84      | 56.82      |
| Ca          | 3.25 | 90.00  | 55.65      | 12.65      | 57.50      |
| Sn          | 3.22 | 90.00  | 54.82      | 11.57      | 56.59      |

CsSnI3

|             | Octahedrons in the unit cell | $l$ - mean value | $l$ - standdev | $\Phi$ - mean value | $\Phi$ - standdev | $\theta_a$ - mean value | $\theta_a$ - standdev | $\theta_b$ - mean value | $\theta_b$ - standdev | $\theta_c$ - mean value | $\theta_c$ - standdev |
|-------------|------------------------------|------------------|----------------|---------------------|-------------------|-------------------------|-----------------------|-------------------------|-----------------------|-------------------------|-----------------------|
| CsSnI3 Exp  | 4                            | 3.121            | 0.002          | 90.000              | 1.052             | 55.19                   | 0.000                 | 7.02                    | 0.000                 | 55.52                   | 0.000                 |
| CsSnI3 Theo | 4                            | 3.200            | 0.006          | 90.000              | 0.884             | 54.33                   | 0.000                 | 10.64                   | 0.000                 | 55.17                   | 0.000                 |

Structure 1: All values were averaged over the octahedrons indicated below.

|          | Octahedrons in the unit cell | $l$ - mean value | $l$ - standdev | $\Phi$ - mean value | $\Phi$ - standdev | $\theta_a$ - mean value | $\theta_a$ - standdev | $\theta_b$ - mean value | $\theta_b$ - standdev | $\theta_c$ - mean value | $\theta_c$ - standdev |
|----------|------------------------------|------------------|----------------|---------------------|-------------------|-------------------------|-----------------------|-------------------------|-----------------------|-------------------------|-----------------------|
| CsSnMgI3 | 4                            | 3.156            | 0.094          | 89.999              | 1.181             | 54.09                   | 1.243                 | 9.86                    | 0.403                 | 54.61                   | 1.379                 |
| Mg       | 1                            | 3.021            | 0.005          | 90.000              | 0.805             | 53.28                   |                       | 10.12                   |                       | 53.79                   |                       |
| Sn       | 3                            | 3.201            | 0.058          | 89.999              | 1.292             | 54.35                   | 1.373                 | 9.77                    | 0.442                 | 54.88                   | 1.551                 |
| CsSnCaI3 | 4                            | 3.226            | 0.021          | 89.998              | 1.254             | 55.10                   | 0.766                 | 11.82                   | 1.302                 | 56.86                   | 0.844                 |
| Ca       | 1                            | 3.247            | 0.007          | 89.991              | 0.707             | 55.67                   |                       | 12.72                   |                       | 57.58                   |                       |
| Sn       | 3                            | 3.219            | 0.019          | 90.000              | 1.398             | 54.91                   | 0.813                 | 11.52                   | 1.414                 | 56.62                   | 0.852                 |

Structure 2: All values were averaged over the octahedrons indicated below.

|          | Octahedrons in the unit cell | $l$ - mean value | $l$ - standdev | $\Phi$ - mean value | $\Phi$ - standdev | $\theta_a$ - mean value | $\theta_a$ - standdev | $\theta_b$ - mean value | $\theta_b$ - standdev | $\theta_c$ - mean value | $\theta_c$ - standdev |
|----------|------------------------------|------------------|----------------|---------------------|-------------------|-------------------------|-----------------------|-------------------------|-----------------------|-------------------------|-----------------------|
| CsSnMgI3 | 4                            | 3.156            | 0.097          | 89.999              | 1.175             | 54.09                   | 1.253                 | 9.83                    | 0.435                 | 54.60                   | 1.381                 |
| Mg       | 1                            | 3.016            | 0.016          | 90.000              | 0.797             | 52.74                   |                       | 10.00                   |                       | 53.11                   |                       |
| Sn       | 3                            | 3.202            | 0.059          | 89.999              | 1.317             | 54.35                   | 1.396                 | 9.72                    | 0.465                 | 54.89                   | 1.543                 |
| CsSnCaI3 | 4                            | 3.226            | 0.020          | 90.000              | 1.299             | 55.10                   | 0.778                 | 11.83                   | 1.303                 | 56.86                   | 0.854                 |
| Ca       | 1                            | 3.248            | 0.008          | 90.000              | 0.865             | 55.67                   |                       | 12.73                   |                       | 57.61                   |                       |
| Sn       | 3                            | 3.219            | 0.018          | 90.000              | 1.425             | 54.91                   | 0.831                 | 11.53                   | 1.418                 | 56.62                   | 0.851                 |



Structure 3: All values were averaged over the octahedrons indicated below.

|                      | Octahedrons in the unit cell | $l$ - mean value | $l$ _standdev | $\Phi$ - mean value | $\Phi$ _standdev | $\Theta_a$ - mean value | $\Theta_a$ _standdev | $\Theta_b$ - mean value | $\Theta_b$ _standdev | $\Theta_c$ - mean value | $\Theta_c$ _standdev |
|----------------------|------------------------------|------------------|---------------|---------------------|------------------|-------------------------|----------------------|-------------------------|----------------------|-------------------------|----------------------|
| CsSnMgI <sub>3</sub> | 4                            | 3.157            | 0.093         | 89.999              | 1.384            | 54.43                   | 1.243                | 9.85                    | 0.401                | 54.86                   | 1.360                |
| Mg                   | 1                            | 3.023            | 1.400         | 89.999              | 1.109            | 53.67                   |                      | 10.09                   |                      | 54.08                   |                      |
| Sn                   | 3                            | 3.202            | 0.056         | 89.999              | 1.478            | 54.69                   | 1.389                | 9.78                    | 0.454                | 55.12                   | 1.539                |
| CsSnCaI <sub>3</sub> | 4                            | 3.225            | 0.020         | 90.000              | 1.150            | 54.97                   | 0.754                | 11.84                   | 1.101                | 56.78                   | 0.834                |
| Ca                   | 1                            | 3.250            | 1.505         | 90.000              | 0.677            | 55.65                   |                      | 12.57                   |                      | 57.41                   |                      |
| Sn                   | 3                            | 3.217            | 0.013         | 90.000              | 1.277            | 54.74                   | 0.736                | 11.60                   | 1.208                | 56.57                   | 0.882                |

Structure 4: All values were averaged over the octahedrons indicated below.

|                      | Octahedrons in the unit cell | $l$ - mean value | $l$ _standdev | $\Phi$ - mean value | $\Phi$ _standdev | $\Theta_a$ - mean value | $\Theta_a$ _standdev | $\Theta_b$ - mean value | $\Theta_b$ _standdev | $\Theta_c$ - mean value | $\Theta_c$ _standdev |
|----------------------|------------------------------|------------------|---------------|---------------------|------------------|-------------------------|----------------------|-------------------------|----------------------|-------------------------|----------------------|
| CsSnMgI <sub>3</sub> | 4                            | 3.157            | 0.098         | 89.999              | 1.374            | 54.42                   | 1.255                | 9.84                    | 0.444                | 54.83                   | 1.374                |
| Mg                   | 1                            | 3.017            | 0.026         | 89.999              | 0.917            | 53.64                   |                      | 10.19                   |                      | 54.01                   |                      |
| Sn                   | 3                            | 3.204            | 0.059         | 90.000              | 1.507            | 54.67                   | 1.401                | 9.73                    | 0.464                | 55.10                   | 1.544                |
| CsSnCaI <sub>3</sub> | 4                            | 3.225            | 0.020         | 90.000              | 1.207            | 54.94                   | 0.765                | 11.86                   | 1.109                | 56.77                   | 0.841                |
| Ca                   | 1                            | 3.251            | 0.016         | 90.000              | 0.813            | 55.62                   |                      | 12.59                   |                      | 57.38                   |                      |
| Sn                   | 3                            | 3.217            | 0.012         | 90.000              | 1.323            | 54.72                   | 0.758                | 11.61                   | 1.220                | 56.56                   | 0.901                |
